# Supplementary material for: Highly efficient one-pot four-component Kabachnik–Fields synthesis of novel α-amino phosphonates under solvent-free and catalyst-free conditions
Source: Royal Society of Chemistry journal article supplement (doi:10.1039/c5ra18311a), 2015-01-01
Supplement: c5ra18311a1.pdf [file c5ra18311a1.pdf]

## Highly efficient one-pot four-component Kabachnik-Fields synthesis of novel $\alpha$ -amino phosphonates under solvent-free and catalyst-free conditions

Zahra Rashid,<sup>a</sup> Hossein Naeimi,<sup>b\*</sup> and Ramin Ghahremanzadeh<sup>\*\*\*</sup>

<sup>a</sup>Nanobiotechnology Research Center, Avicenna Research Institute, (ACECR), Tehran, Iran. E-mail: [R.ghahremanzadeh@yahoo.com](mailto:R.ghahremanzadeh@yahoo.com)

<sup>b</sup>Department of Organic Chemistry, Faculty of Chemistry, University of Kashan, Kashan, 87317, I.R. Iran.  
E-mail: [Naeimi@kashanu.ac.ir](mailto:Naeimi@kashanu.ac.ir)

### SUPPORTING INFORMATION

| <i>List of contents</i>                   | <i>Page</i> | <i>List of contents</i>          | <i>Page</i> |
|-------------------------------------------|-------------|----------------------------------|-------------|
| Title, author's name, address             | <b>1</b>    | <sup>1</sup> H NMR of <b>7k</b>  | <b>26</b>   |
| General methods and characterization data | <b>2-11</b> | <sup>13</sup> C NMR of <b>7k</b> | <b>27</b>   |
| <sup>1</sup> H NMR of <b>7a</b>           | <b>12</b>   | <sup>1</sup> H NMR of <b>7l</b>  | <b>28</b>   |
| <sup>13</sup> C NMR of <b>7a</b>          | <b>13</b>   | <sup>1</sup> H NMR of <b>7m</b>  | <b>29</b>   |
| <sup>1</sup> H NMR of <b>7b</b>           | <b>14</b>   | <sup>1</sup> H NMR of <b>7n</b>  | <b>30</b>   |
| <sup>13</sup> C NMR of <b>7b</b>          | <b>15</b>   | <sup>1</sup> H NMR of <b>7o</b>  | <b>31</b>   |
| <sup>1</sup> H NMR of <b>7c</b>           | <b>16</b>   | <sup>1</sup> H NMR of <b>7p</b>  | <b>32</b>   |
| <sup>1</sup> H NMR of <b>7d</b>           | <b>17</b>   | <sup>1</sup> H NMR of <b>7q</b>  | <b>33</b>   |
| <sup>13</sup> C NMR of <b>7d</b>          | <b>18</b>   | <sup>1</sup> H NMR of <b>7r</b>  | <b>34</b>   |
| <sup>1</sup> H NMR of <b>7e</b>           | <b>19</b>   |                                  |             |
| <sup>13</sup> C NMR of <b>7e</b>          | <b>20</b>   |                                  |             |
| <sup>1</sup> H NMR of <b>7f</b>           | <b>21</b>   |                                  |             |
| <sup>1</sup> H NMR of <b>7g</b>           | <b>22</b>   |                                  |             |
| <sup>1</sup> H NMR of <b>7h</b>           | <b>23</b>   |                                  |             |
| <sup>1</sup> H NMR of <b>7i</b>           | <b>24</b>   |                                  |             |
| <sup>1</sup> H NMR of <b>7j</b>           | <b>25</b>   |                                  |             |

## Experimental Part

### Reagents and Materials:

The chemicals used in this work were obtained from Fluka and Merck and were used without purification. Melting points were measured on an Electrothermal 9200 apparatus. IR spectra were recorded as KBr pellets on a Perkin-Elmer 781 spectrophotometer and an Impact 400 Nicolet FT-IR spectrophotometer.  $^1\text{H}$  NMR and  $^{13}\text{C}$  NMR spectra were recorded in  $\text{DMSO}-d_6$  solvents on a Bruker DRX-400 spectrometer with tetramethylsilane as internal reference. The elemental analyses (C, H, N) were obtained from a Carlo ERBA Model EA 1108 analyzer. The purity determination of the substrates and reaction monitoring were accomplished by TLC on silica-gel polygram SILG/UV 254 plates (from Merck Company).

### General procedure for synthesis of $\alpha$ -aminophosphonates

A mixture of ninhydrin **1** (1 mmol) and 1,2-phenylenediamines **2** (1 mmol) was stirred by a magnet in a test tube under solvent free conditions at room temperature for 10 min, followed by the addition of aniline derivatives (1 mmol) temperature was slowly increased until 70 °C. The reaction mixture was stirred for appropriate time, after nearly complete conversion into an intermediate presumed to be the corresponding intermediate **5** (as indicated by TLC), alkyl /aryl phosphite (1 mmol) was then added to the reaction mixture which was heated at 70 °C. After completion of the reaction (as assessed by TLC), the reaction mixture was cooled to room temperature, and EtOH (5 mL) was added to the crude products and stirred for a while. The reaction mixture was filtered and the precipitate washed with EtOH to afford the pure products. The spectroscopic and analytical data for synthesized compounds are presented below.

**Diphenyl 11-(*p*-tolylamino)-11*H*-indeno[1,2-*b*]quinoxalin-11-ylphosphonate (7a):**

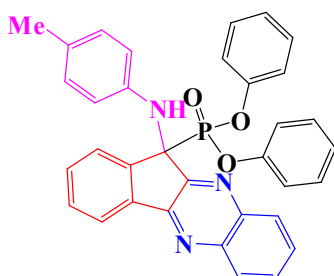

Yellow powder (Yield: 90%). mp>300°C. IR (KBr) ( $\nu_{\max}$ /  $\text{cm}^{-1}$ ): 3384, 1589, 1487, 1268, 1189, 930, 768.  $^1\text{H}$  NMR (DMSO- $d_6$ , 400 MHz):  $\delta_{\text{ppm}}$ : 1.85 (3H, s, CH<sub>3</sub>) 6.94 (1H, d, NH,  $^3j_{\text{HP}}=11.6$  Hz), 6.08-8.28 (22 H, m, ArH).  $^{13}\text{C}$  NMR (DMSO- $d_6$ , 100 MHz):  $\delta_{\text{ppm}}$ : 20.2, 67.9 (1C, d, C-P,  $^1j_{\text{CP}}=148$  Hz), 116.3, 120.6, 120.9, 123.3, 126.1, 127.8, 129.5, 129.8, 130.1, 130.3, 130.5, 131.3, 132.5, 137.6, 141.2, 142.4, 142.8, 143.0, 143.4, 150.2, 150.5, 153.8. Anal. Calcd for C<sub>35</sub>H<sub>28</sub>N<sub>3</sub>O<sub>3</sub>P: C, 73.80; H, 4.95; N, 7.38%;. Found C, 73.92; H, 4.89; N, 7.47%; MS:  $m/z$  569.

**Diphenyl 11-(*o*-tolylamino)-11*H*-indeno[1,2-*b*]quinoxalin-11-ylphosphonate (7b):**

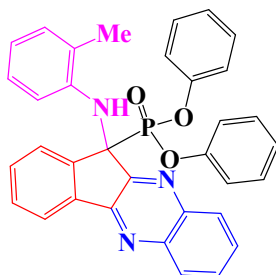

Yellow powder (Yield: 89%). mp>300°C. IR (KBr) ( $\nu_{\max}$ /  $\text{cm}^{-1}$ ): 3389, 1588, 1485, 1277, 1196, 927, 764.  $^1\text{H}$  NMR (DMSO- $d_6$ , 400 MHz):  $\delta_{\text{ppm}}$ : 2.25 (3H, s, CH<sub>3</sub>) 6.99 (1H, d, NH,  $^3j_{\text{HP}}=8$  Hz), 6.39-8.32 (22 H, m, ArH).  $^{13}\text{C}$  NMR (DMSO- $d_6$ , 100 MHz):  $\delta_{\text{ppm}}$ : 17.8, 67.1 (1C, d, C-P,  $^1j_{\text{CP}}=142$  Hz), 113.8, 119.9, 120.3, 120.4, 120.7, 120.8, 123.4, 125.9, 126.1, 126.2, 126.7, 127.4, 129.5, 129.9, 130.3, 130.4, 130.6, 130.9, 131.5, 131.9, 132.7, 142.5, 150.3, 150.6. Anal. Calcd for C<sub>34</sub>H<sub>26</sub>N<sub>3</sub>O<sub>3</sub>P: C, 73.50; H, 4.72; N, 7.56%;. Found C, 73.37; H, 4.77; N, 7.62%; MS:  $m/z$  555.

**Diphenyl 11-(4-bromophenylamino)-11H-indeno[1,2-b]quinoxalin-11-ylphosphonate (7c):**

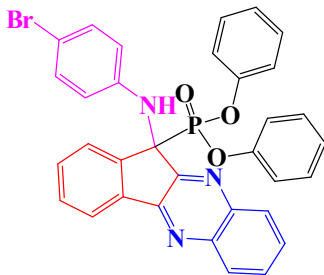

Cream powder (Yield: 93%). mp>300°C. IR (KBr) ( $\nu_{\max}$ /  $\text{cm}^{-1}$ ): 3335, 1589, 1487, 1265, 1205, 955, 761.  $^1\text{H}$  NMR (DMSO- $d_6$ , 400 MHz):  $\delta_{\text{ppm}}$ : 6.20 (1H, d, NH,  $^3J_{\text{HP}}=12$  Hz), 6.13-8.30 (22H, m, ArH). Anal. Calcd for  $\text{C}_{33}\text{H}_{23}\text{BrN}_3\text{O}_3\text{P}$ : C, 63.88; H, 3.74; N, 6.77%;. Found C, 63.75; H, 3.67; N, 6.85%; MS:  $m/z$  619.

**Diphenyl 11-(4-chlorophenylamino)-11H-indeno[1,2-b]quinoxalin-11-ylphosphonate (7d):**

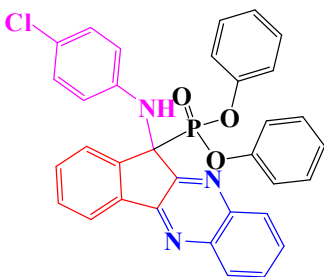

Yellow powder (Yield: 84%). mp>300°C. IR (KBr) ( $\nu_{\max}$ /  $\text{cm}^{-1}$ ): 3293, 1591, 1490, 1251, 1205, 955, 759.  $^1\text{H}$  NMR (DMSO- $d_6$ , 400 MHz):  $\delta_{\text{ppm}}$ : 7.50 (1H, d, NH,  $^3J_{\text{HP}}=12$  Hz), 6.16-8.30 (22H, m, ArH).  $^{13}\text{C}$  NMR (DMSO- $d_6$ , 100 MHz):  $\delta_{\text{ppm}}$ : 67.8 (1C, d, C-P,  $^1j_{\text{CP}}=147$  Hz), 117.0, 120.5, 120.9, 123.4, 126.1, 127.4, 129.5, 129.8, 130.4, 130.6, 131.4, 132.6, 137.7, 141.2, 142.5, 142.9, 144.3, 144.5, 150.2, 150.5, 153.6, 159.9. Anal. Calcd for  $\text{C}_{33}\text{H}_{23}\text{ClN}_3\text{O}_3\text{P}$ : C, 68.81; H, 4.02; N, 7.30%;. Found C, 68.94; H, 4.09; N, 7.22%; MS:  $m/z$  575.

**Diphenyl 7,8-dimethyl-11-(phenylamino)-11H-indeno[1,2-*b*]quinoxalin-11-ylphosphonate (7e):**

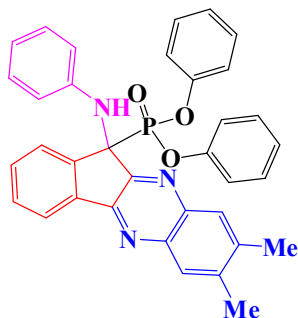

Yellow powder (Yield: 86%). mp>300°C. IR (KBr) ( $\nu_{\max}$ /  $\text{cm}^{-1}$ ): 3428, 1591, 1489, 1271, 1205, 945, 767.  $^1\text{H}$  NMR (DMSO- $d_6$ , 400 MHz):  $\delta_{\text{ppm}}$ : 7.07 (1H, d, NH,  $^3J_{\text{HP}}=7$  Hz), 6.14-8.24 (20H, m, ArH).  $^{13}\text{C}$  NMR (DMSO- $d_6$ , 100 MHz):  $\delta_{\text{ppm}}$ : 20.1, 20.3, 67.8 (1C, d, C-P,  $^1j_{\text{CP}}=148$  Hz), 116.6, 120.6, 121.0, 122.9, 125.8, 126.0, 127.4, 127.7, 128.9, 129.4, 130.1, 130.3, 131.0, 132.0, 138.0, 140.1, 141.2, 141.6, 142.9, 143.1, 150.4, 152.9, 157.3. Anal. Calcd for  $\text{C}_{35}\text{H}_{28}\text{N}_3\text{O}_3\text{P}$ : C, 73.80; H, 4.95; N, 7.38%;. Found C, 73.71; H, 4.87; N, 7.31%; MS:  $m/z$  569.

**Diphenyl 11-(4-chlorophenylamino)-7,8-dimethyl-11H-indeno[1,2-*b*]quinoxalin-11-ylphosphonate (7f):**

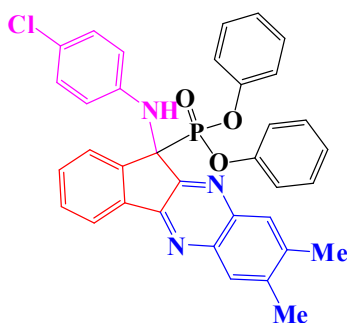

Yellow powder (Yield: 82%). mp>300°C. IR (KBr) ( $\nu_{\max}$ /  $\text{cm}^{-1}$ ): 3423, 1592, 1490, 1270, 1207, 949, 763.  $^1\text{H}$  NMR (DMSO- $d_6$ , 400 MHz):  $\delta_{\text{ppm}}$ : 2.44 (3H, s,  $\text{CH}_3$ ), 2.48 (3H, s,  $\text{CH}_3$ ), 7.42 (1H, d, NH,  $^3J_{\text{HP}}=11$  Hz), 6.14-8.24 (20H, m, ArH). Anal. Calcd for  $\text{C}_{35}\text{H}_{27}\text{ClN}_3\text{O}_3\text{P}$ : C, 69.59; H, 4.51; N, 6.96%;. Found C, 69.47; H, 4.56; N, 7.01%; MS:  $m/z$  603.

**Diphenyl (11-((3,4-dimethylphenyl)amino)-11H-indeno[1,2-b]quinoxalin-11-yl)phosphonate (7g):**

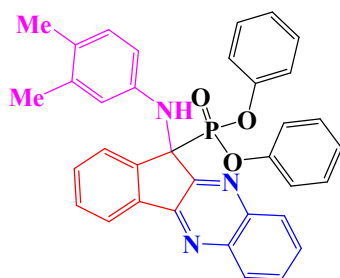

Yellow powder (Yield: 89%). mp>300°C. IR (KBr) ( $\nu_{\max}$ /  $\text{cm}^{-1}$ ): 3427, 1587, 1493, 1273, 1210, 953, 758.  $^1\text{H}$  NMR (DMSO- $d_6$ , 400 MHz):  $\delta_{\text{ppm}}$ : 1.83 (3H, s, CH<sub>3</sub>), 1.85 (3H, s, CH<sub>3</sub>), 6.44 (1H, d, NH,  $^3J_{\text{HP}} = 12$  Hz), 5.64-7.96 (21H, m, ArH). Anal. Calcd for C<sub>35</sub>H<sub>28</sub>N<sub>3</sub>O<sub>3</sub>P: C, 73.80; H, 4.96; N, 7.38%. Found C, 73.71; H, 4.88; N, 7.44%; MS:  $m/z$  569.

**Diphenyl (11-((4-methoxyphenyl)amino)-11H-indeno[1,2-b]quinoxalin-11-yl)phosphonate (7h):**

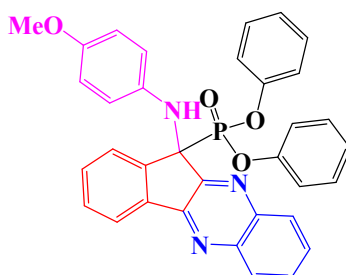

Yellow powder (Yield: 85%). mp>300°C. IR (KBr) ( $\nu_{\max}$ /  $\text{cm}^{-1}$ ): 3429, 1588, 1485, 1270, 1210, 953, 766.  $^1\text{H}$  NMR (DMSO- $d_6$ , 400 MHz):  $\delta_{\text{ppm}}$ : 3.43 (3H, s, OCH<sub>3</sub>), 6.40 (1H, d, NH,  $^3J_{\text{HP}} = 12$  Hz), 6.20-7.94 (21H, m, ArH). Anal. Calcd for C<sub>37</sub>H<sub>26</sub>N<sub>3</sub>O<sub>4</sub>P: C, 71.45; H, 4.59; N, 7.35%. Found C, 71.37; H, 4.53; N, 7.43%; MS:  $m/z$  571.

**Diisopropyl 11-(4-bromophenylamino)-11H-indeno[1,2-b]quinoxalin-11-ylphosphonate (7i):**

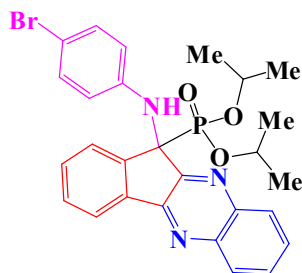

Yellow powder (Yield: 83%). mp>300°C. IR (KBr) ( $\nu_{\max}$ /  $\text{cm}^{-1}$ ): 3294, 1592, 1490, 1240, 1008, 757.  $^1\text{H}$  NMR (DMSO- $d_6$ , 400 MHz):  $\delta_{\text{ppm}}$ :  $^1\text{H}$  NMR (DMSO- $d_6$ , 400 MHz):  $\delta_{\text{ppm}}$ : 1.04 (3H, d, CH<sub>3</sub>), 1.05 (3H, d, CH<sub>3</sub>), 1.14 (3H, d, CH<sub>3</sub>), 1.16 (3H, d, CH<sub>3</sub>), 1.88 (3H, s, CH<sub>3</sub>), 2.29 (3H, s, CH<sub>3</sub>), 4.38 (1H, m, OCH), 4.53 (1H, m, OCH), 6.75 (1H, d, NH,  $^3J_{\text{HP}} = 12$  Hz), 6.01-8.23 (12H, m, ArH). Anal. Calcd for C<sub>27</sub>H<sub>27</sub>BrN<sub>3</sub>O<sub>3</sub>P: C, 58.71; H, 4.93; N, 7.61%. Found C, 58.84; H, 4.99; N, 7.54%; MS:  $m/z$  551.

**Diisopropyl 11-(2,4-dimethylphenylamino)-11H-indeno[1,2-b]quinoxalin-11-ylphosphonate (7j):**

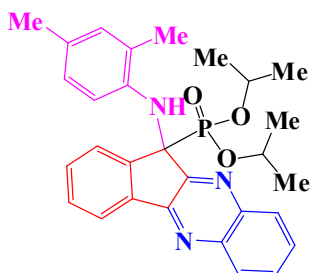

Yellow powder (Yield: 85%). mp>300°C. IR (KBr) ( $\nu_{\max}$ /  $\text{cm}^{-1}$ ): 3421, 1511, 1251, 1002, 759.  $^1\text{H}$  NMR (DMSO- $d_6$ , 400 MHz):  $\delta_{\text{ppm}}$ : 1.03 (3H, d, CH<sub>3</sub>), 1.10 (3H, d, CH<sub>3</sub>), 1.13 (3H, d, CH<sub>3</sub>), 1.19 (3H, d, CH<sub>3</sub>), 1.88 (3H, s, CH<sub>3</sub>), 2.29 (3H, s, CH<sub>3</sub>), 4.38 (1H, m, OCH), 4.55 (1H, m, OCH), 5.18 (1H, d, NH,  $^3J_{\text{HP}} = 12$  Hz), 4.98-8.24 (11H, m, ArH). Anal. Calcd for C<sub>29</sub>H<sub>32</sub>N<sub>3</sub>O<sub>3</sub>P: C, 69.45; H, 6.43; N, 8.38%. Found C, 69.32; H, 6.50; N, 8.46%; MS:  $m/z$  501.

**Diisopropyl 11-(p-tolylamino)-11H-indeno[1,2-b]quinoxalin-11-ylphosphonate (7k):**

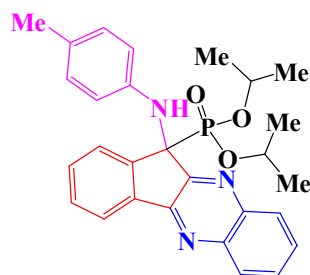

Yellow powder (Yield: 92%). mp>300°C. IR (KBr) ( $\nu_{\max}$ /  $\text{cm}^{-1}$ ): 3308, 1614, 1516, 1238, 1101, 1005, 758.  $^1\text{H}$  NMR (DMSO- $d_6$ , 400 MHz):  $\delta_{\text{ppm}}$ : 1.17 (9H, m, 3CH<sub>3</sub>), 1.20 (3H, s, CH<sub>3</sub>), 3.33 (3H, s, CH<sub>3</sub>), 3.33 (1H, m, OCH), 4.56 (1H, m, OCH), 5.96 (1H, d, NH,  $^3J_{\text{HP}}$ = 10.8 Hz), 5.10-8.24 (12H, m, ArH).  $^{13}\text{C}$  NMR (DMSO- $d_6$ , 100 MHz):  $\delta_{\text{ppm}}$ : 16.5, 55.3, 64.3, 64.7, 67.1 (1C, d, C-P,  $^1j_{\text{CP}}$ =143 Hz), 114.3, 117.6, 122.9, 127.1, 129.4, 129.8, 130.2, 130.5, 130.9, 132.1, 137.4, 139.2, 141.2, 142.2, 144.7, 152.7, 153.8, 159.7. Anal. Calcd for C<sub>28</sub>H<sub>30</sub>N<sub>3</sub>O<sub>3</sub>P: C, 68.98; H, 6.20; N, 8.62%;. Found C, 68.86; H, 6.25; N, 8.71%; MS:  $m/z$  487.

**Diethyl 11-(4-chlorophenylamino)-7,8-dimethyl-11H-indeno[1,2-b]quinoxalin-11-ylphosphonate (7l):**

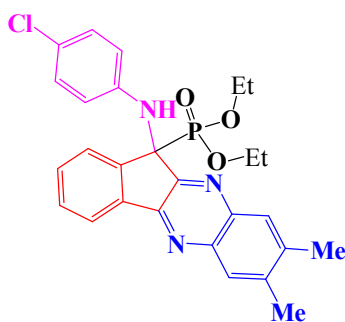

Orange powder (Yield: 80%). mp>300°C. IR (KBr) ( $\nu_{\max}$ /  $\text{cm}^{-1}$ ): 3427, 1602, 1494, 1233, 1025, 752.  $^1\text{H}$  NMR (DMSO- $d_6$ , 400 MHz):  $\delta_{\text{ppm}}$ : 0.99 (3H, t, CH<sub>3</sub>), 1.08 (3H, t, CH<sub>3</sub>), 2.43 (3H, s, CH<sub>3</sub>), 2.47 (3H, s, CH<sub>3</sub>), 3.83 (2H, q, OCH<sub>2</sub>), 3.98 (2H, q, OCH<sub>2</sub>), 6.80 (1H, d, NH,  $^3J_{\text{HP}}$ = 12 Hz), 6.03-7.95 (10H, m, ArH). Anal. Calcd for C<sub>27</sub>H<sub>27</sub>ClN<sub>3</sub>O<sub>3</sub>P: C, 63.84; H, 5.36; N, 8.27%;. Found C, 63.70; H, 5.41; N, 8.18%; MS:  $m/z$  508.



**Diethyl 7,8-dimethyl-11-(*p*-tolylamino)-11*H*-indeno[1,2-*b*]quinoxalin-11-ylphosphonate (7m):**

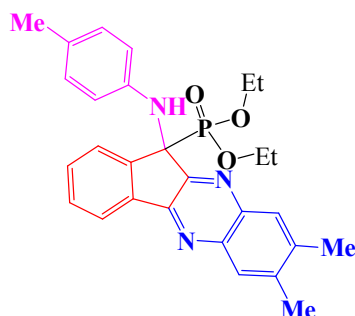

Yellow powder (Yield: 86%). mp>300°C. IR (KBr) ( $\nu_{\max}$ /  $\text{cm}^{-1}$ ): 3431, 1618, 1520, 1236, 1025.  $^1\text{H}$  NMR (DMSO- $d_6$ , 400 MHz):  $\delta_{\text{ppm}}$ : 1.00 (3H, t, CH<sub>3</sub>), 1.09 (3H, t, CH<sub>3</sub>), 2.44 (3H, s, CH<sub>3</sub>), 2.48 (3H, s, CH<sub>3</sub>), 3.83 (2H, q, OCH<sub>2</sub>), 3.98 (2H, q, OCH<sub>2</sub>), 6.21 (1H, d, NH,  $^3J_{\text{HP}} = 11.2$  Hz), 5.94-8.16 (10H, m, ArH). Anal. Calcd for C<sub>28</sub>H<sub>30</sub>N<sub>3</sub>O<sub>3</sub>P: C, 68.98; H, 6.20; N, 8.62%. Found C, 69.11; H, 6.13; N, 8.71%; MS:  $m/z$  487.

**Diethyl 11-(4-bromophenylamino)-11*H*-indeno[1,2-*b*]quinoxalin-11-ylphosphonate (7n):**

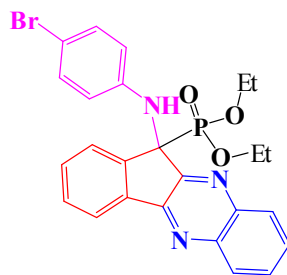

Orange powder (Yield: 83%). mp>300°C. IR (KBr) ( $\nu_{\max}$ /  $\text{cm}^{-1}$ ): 3279, 1593, 1490, 1238, 1034, 756.  $^1\text{H}$  NMR (DMSO- $d_6$ , 400 MHz):  $\delta_{\text{ppm}}$ : 0.98 (3H, t, CH<sub>3</sub>), 1.09 (3H, t, CH<sub>3</sub>), 3.77 (2H, q, OCH<sub>2</sub>), 4.00 (2H, q, OCH<sub>2</sub>), 6.94 (1H, d, NH,  $^3J_{\text{HP}} = 10.4$  Hz), 6.00-8.24 (12H, m, ArH). Anal. Calcd for C<sub>25</sub>H<sub>23</sub>BrN<sub>3</sub>O<sub>3</sub>P: C, 57.27; H, 4.42; N, 8.01%. Found C, 57.20; H, 4.46; N, 8.09%; MS:  $m/z$  524.

**Diethyl 11-(4-chlorophenylamino)-11H-indeno[1,2-b]quinoxalin-11-ylphosphonate (7o):**

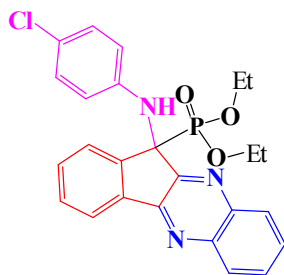

Cream powder (Yield: 87%). mp>300°C. IR (KBr) ( $\nu_{\max}$ /  $\text{cm}^{-1}$ ): 3410, 1591, 1493, 1256, 1009, 757.  $^1\text{H}$  NMR (DMSO- $d_6$ , 400 MHz):  $\delta_{\text{ppm}}$ : 1.09 (3H, t, CH<sub>3</sub>), 1.11 (3H, t, CH<sub>3</sub>), 4.01 (2H, q, OCH<sub>2</sub>), 4.02 (2H, q, OCH<sub>2</sub>), 6.93 (1H, d, NH,  $^3J_{\text{HP}} = 12$  Hz), 6.04-8.25 (12H, m, ArH). Anal. Calcd for C<sub>25</sub>H<sub>23</sub>ClN<sub>3</sub>O<sub>3</sub>P: C, 62.57; H, 4.83; N, 8.76%. Found C, 62.41; H, 4.77; N, 8.85%; MS:  $m/z$  479.

**Diethyl 11-((3,4-dimethylphenyl)amino)-11H-indeno[1,2-b]quinoxalin-11-ylphosphonate (7p):**

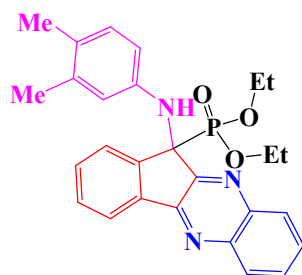

Yellow powder (Yield: 89%). mp>300°C. IR (KBr) ( $\nu_{\max}$ /  $\text{cm}^{-1}$ ): 3415, 1585, 1487, 1250, 1020, 757.  $^1\text{H}$  NMR (DMSO- $d_6$ , 400 MHz):  $\delta_{\text{ppm}}$ : 1.04 (3H, t, CH<sub>3</sub>), 1.10 (3H, t, CH<sub>3</sub>), 1.80 (3H, s, CH<sub>3</sub>), 1.82 (3H, s, CH<sub>3</sub>), 3.60 (2H, q, OCH<sub>2</sub>), 4.03 (2H, q, OCH<sub>2</sub>), 6.38 (1H, d, NH,  $^3J_{\text{HP}} = 12$  Hz), 5.49-8.25 (11H, m, ArH). Anal. Calcd for C<sub>27</sub>H<sub>28</sub>N<sub>3</sub>O<sub>3</sub>P: C, 68.49; H, 5.96; N, 8.87%. Found C, 68.41; H, 5.88; N, 8.79%; MS:  $m/z$  573.

**Dimethyl 11-(4-bromophenylamino)-7,8-dimethyl-11H-indeno[1,2-b]quinoxalin-11-ylphosphonate (7q):**

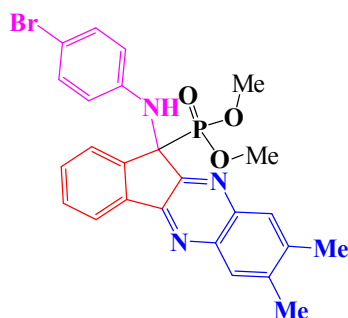

Pale yellow powder (Yield: 92%). mp>300°C. IR (KBr) ( $\nu_{\max}$ /  $\text{cm}^{-1}$ ): 3283, 1549, 1492, 1242, 1038, 767.  $^1\text{H}$  NMR (DMSO- $d_6$ , 400 MHz):  $\delta_{\text{ppm}}$ : 2.47 (3H, s, CH<sub>3</sub>), 2.48 (3H, s, CH<sub>3</sub>), 3.51 (3H, d, OCH<sub>3</sub>), 3.64 (3H, d, OCH<sub>3</sub>), 6.94 (1H, d, NH,  $^3J_{\text{HP}} = 12$  Hz), 5.97-8.20 (10H, m, ArH). Anal. Calcd for C<sub>25</sub>H<sub>23</sub>BrN<sub>3</sub>O<sub>3</sub>P: C, 57.27; H, 4.42; N, 8.01%. Found C, 57.38; H, 4.47; N, 8.10%; MS:  $m/z$  524.

**Dimethyl (11-((4-methoxyphenyl)amino)-11H-indeno[1,2-b]quinoxalin-11-yl)phosphonate (7r):**

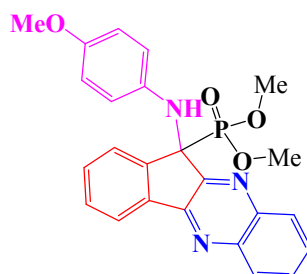

Yellow powder (Yield: 92%). mp>300°C. IR (KBr) ( $\nu_{\max}$ /  $\text{cm}^{-1}$ ): 3278, 1540, 1485, 1252, 1020, 763.  $^1\text{H}$  NMR (DMSO- $d_6$ , 400 MHz):  $\delta_{\text{ppm}}$ : 3.41 (3H, s, OCH<sub>3</sub>), 3.53 (3H, d, OCH<sub>3</sub>), 3.68 (3H, d, OCH<sub>3</sub>), 6.23 (1H, d, NH,  $^3J_{\text{HP}} = 12$  Hz), 6.04-8.21 (12H, m, ArH). Anal. Calcd for C<sub>24</sub>H<sub>22</sub>N<sub>3</sub>O<sub>4</sub>P: C, 64.43; H, 4.96; N, 9.39%. Found C, 64.35; H, 4.84; N, 9.30%; MS:  $m/z$  447.



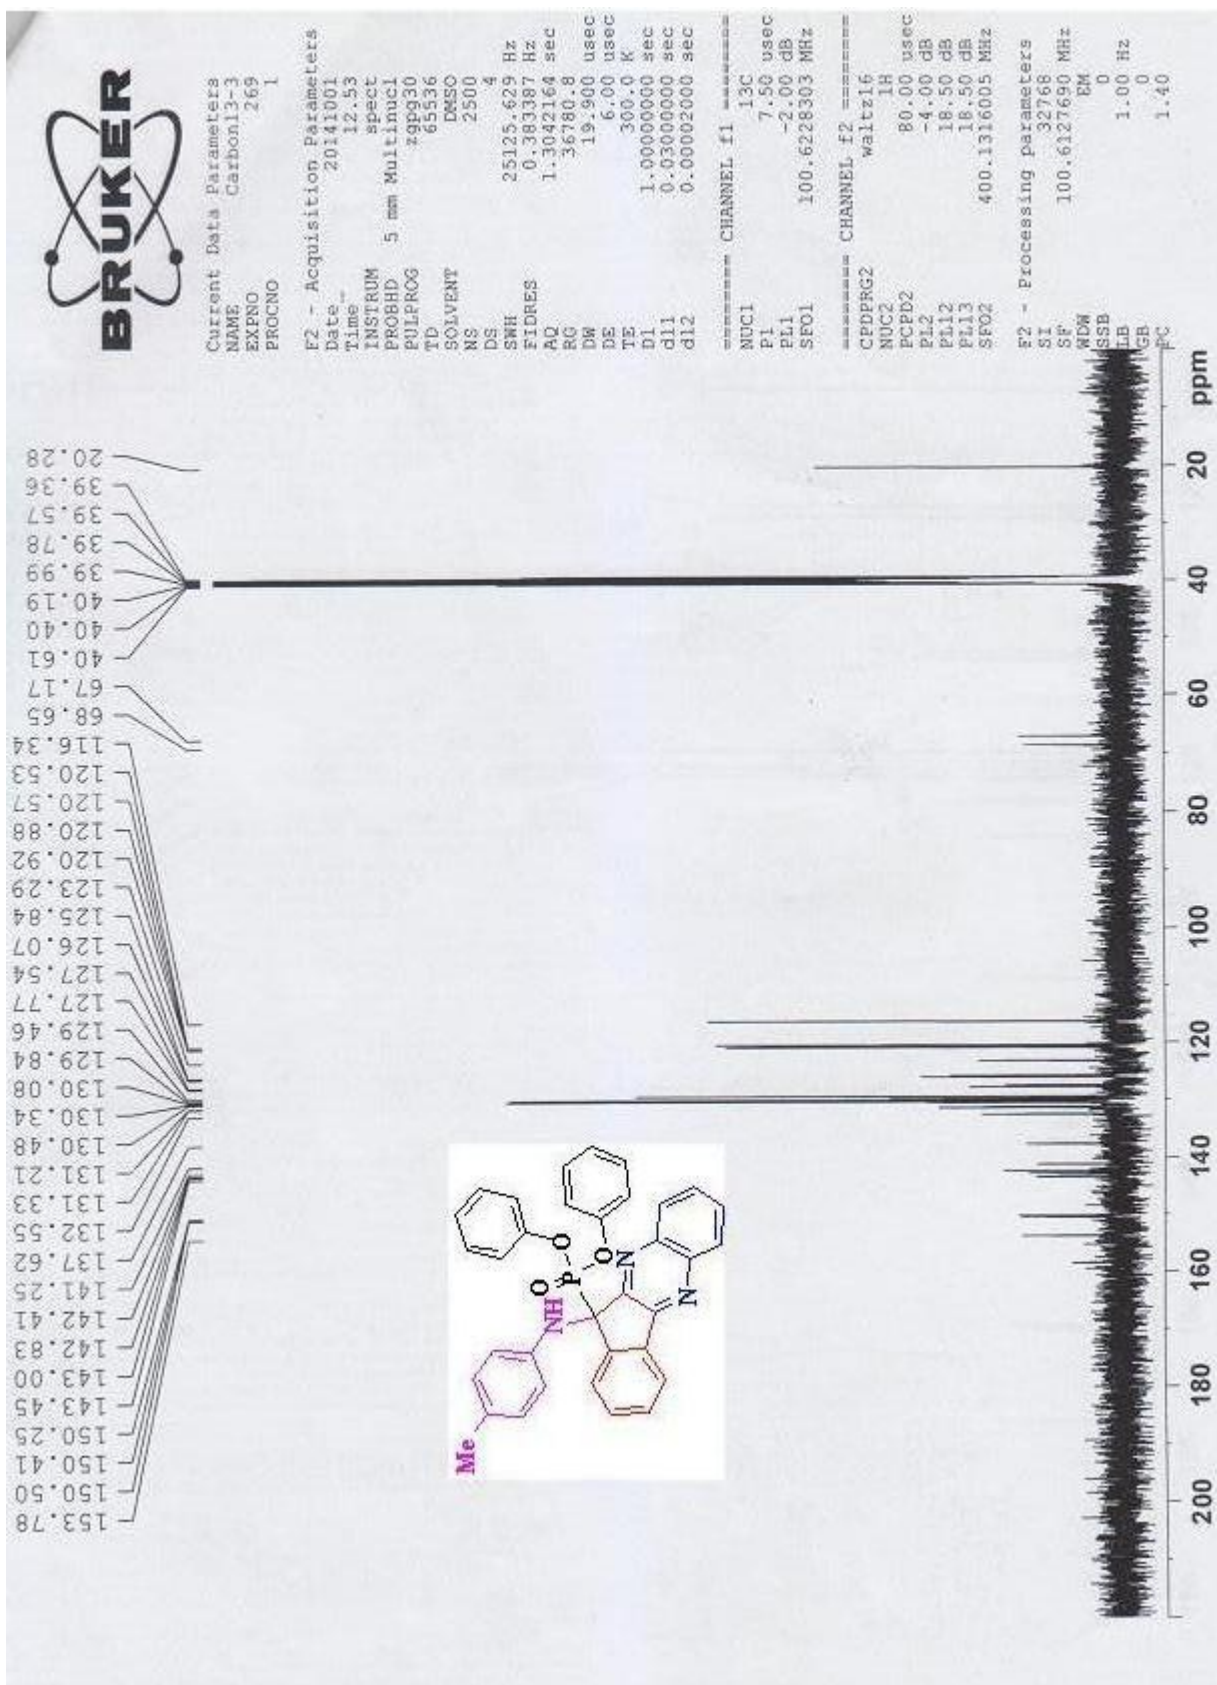

<sup>13</sup>C NMR of 7a

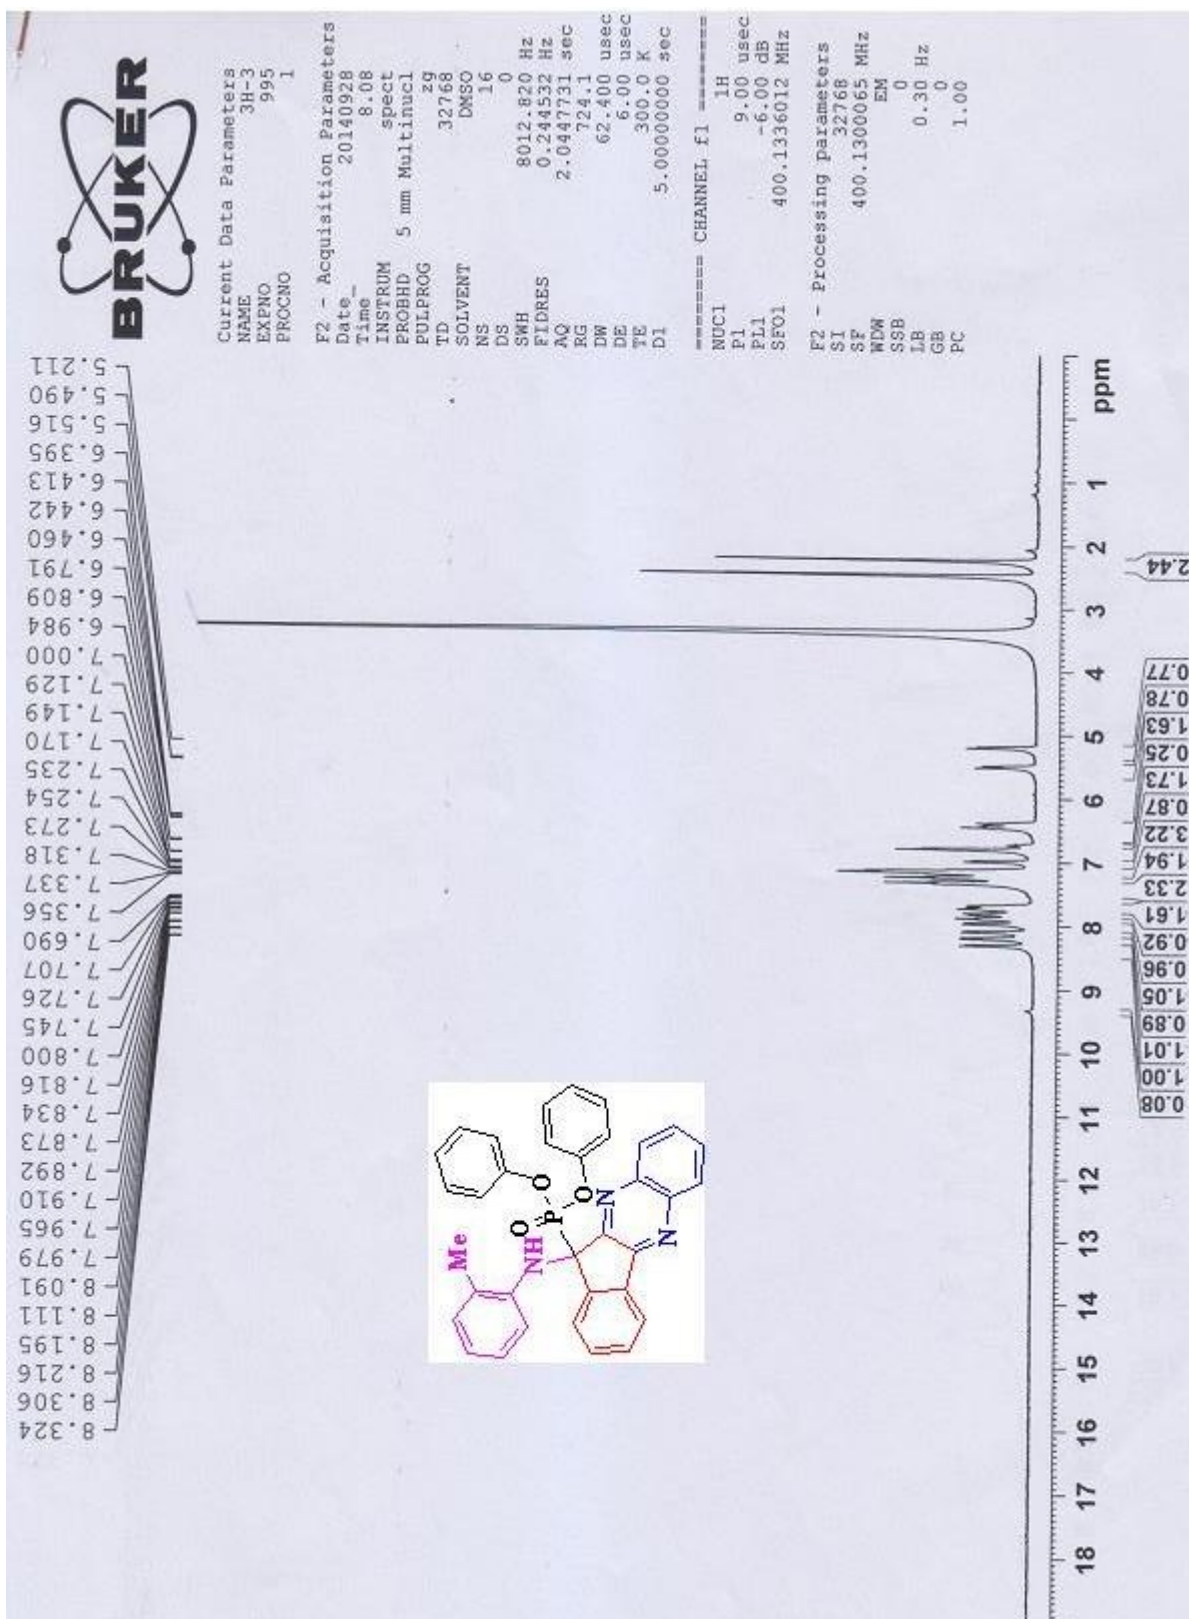

<sup>1</sup>H NMR of 7b

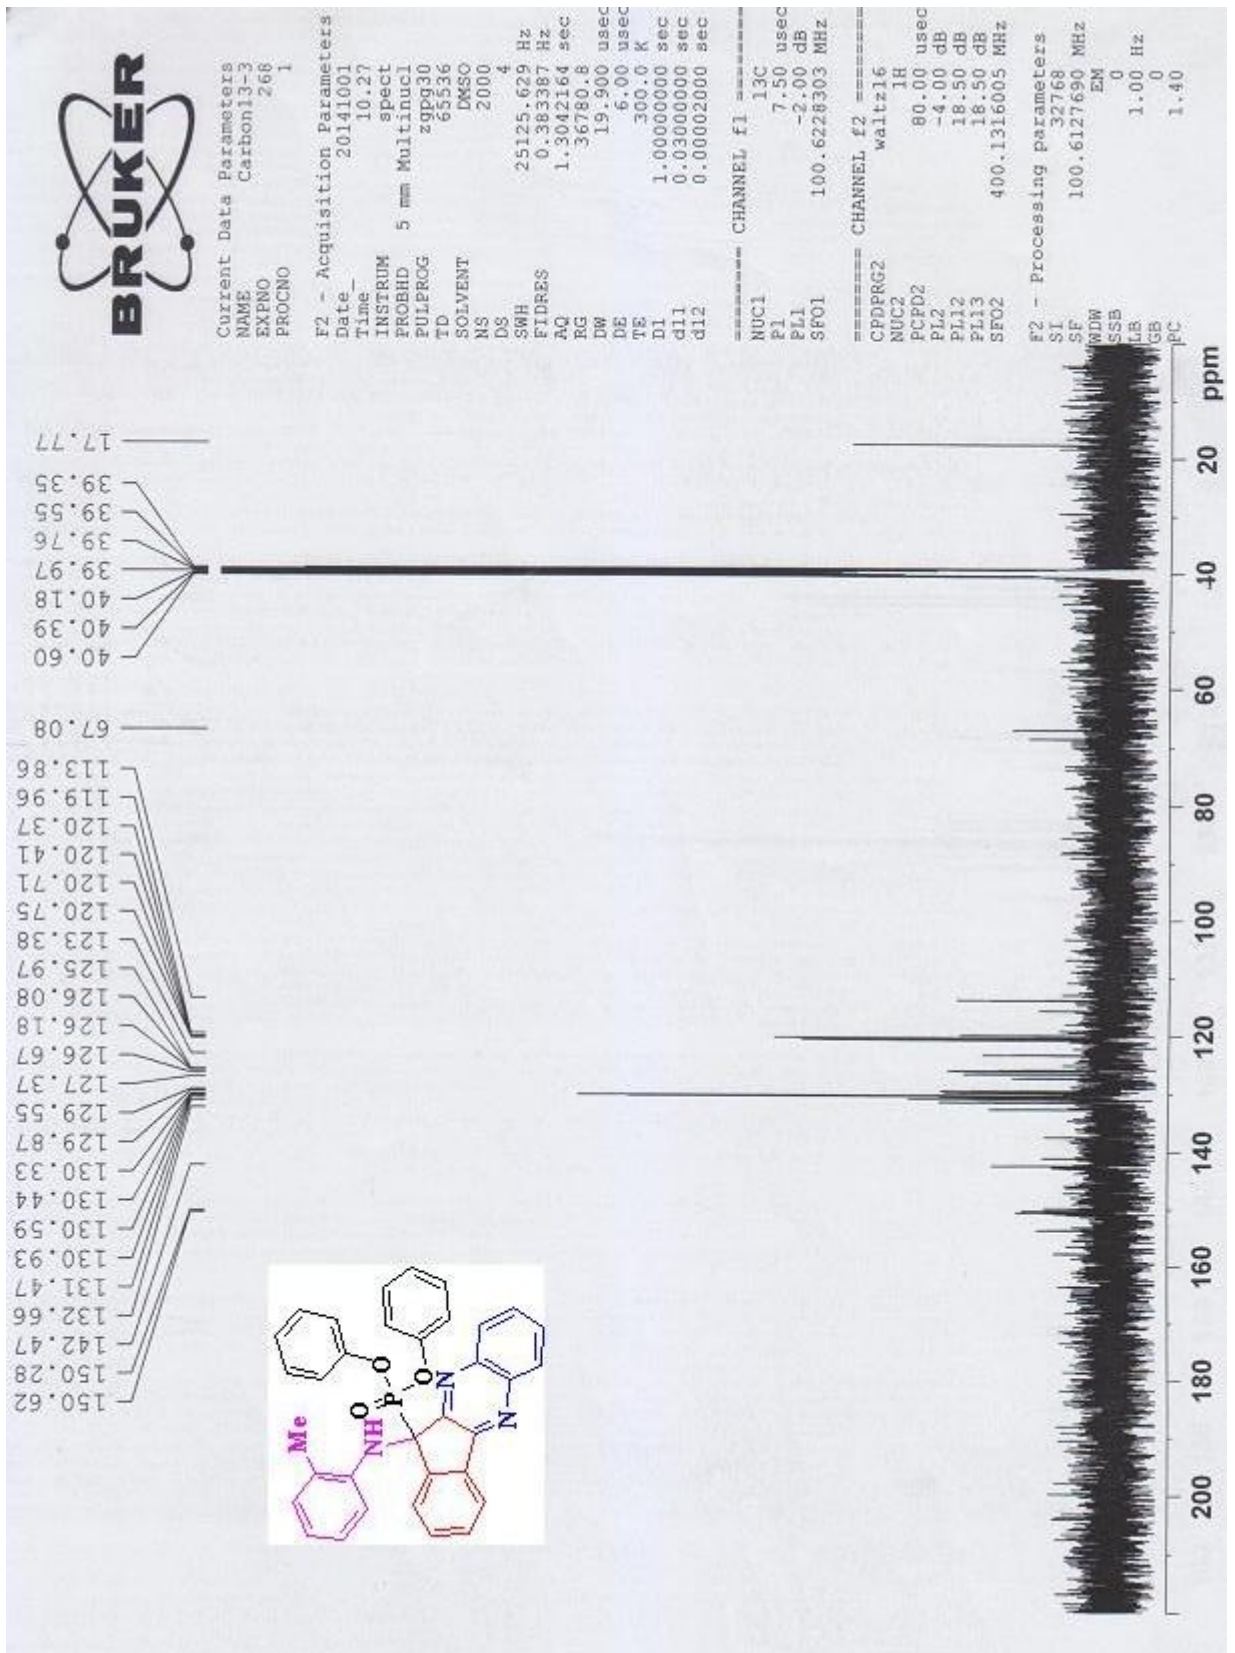

<sup>13</sup>C NMR of 7b

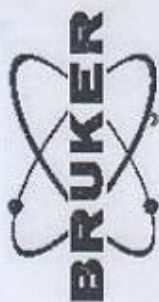

Current Data Parameters  
NAME 3H-3  
EXPNO 2048  
PROCNO 1

F2 - Acquisition Parameters  
Date\_ 20141105  
Time\_ 15.02  
INSTRUM spect  
PROBHD 5 mm Multinucl  
PULPROG zg  
TD 32768  
SOLVENT DMSO  
NS 16  
DS 0  
SWH 8012.820 Hz  
FIDRES 0.244532 Hz  
AQ 2.0447731 sec  
RG 322.5  
DW 62.400 usec  
DE 6.00 usec  
TE 300.0 K  
D1 5.00000000 sec

==== CHANNEL f1 =====  
NUC1 1H  
PI 9.00 usec  
PL1 -6.00 dB  
SF01 400.1336012 MHz

F2 - Processing parameters  
SI 32768  
SF 400.1300065 MHz  
WDW EM  
SSB 0  
LB 0.30 Hz  
GB 0  
PC 1.00

8.305  
8.287  
8.214  
8.193  
8.162  
8.145  
8.115  
8.095  
8.074  
7.920  
7.904  
7.892  
7.871  
7.840  
7.821  
7.803  
7.751  
7.733  
7.711  
7.690  
7.672  
7.542  
7.505  
7.333  
7.314  
7.296  
7.253  
7.207  
7.189  
7.168  
7.142  
7.122  
7.087  
7.068  
7.000  
6.952  
6.931  
6.880  
6.859  
6.754  
6.735  
6.675  
6.656

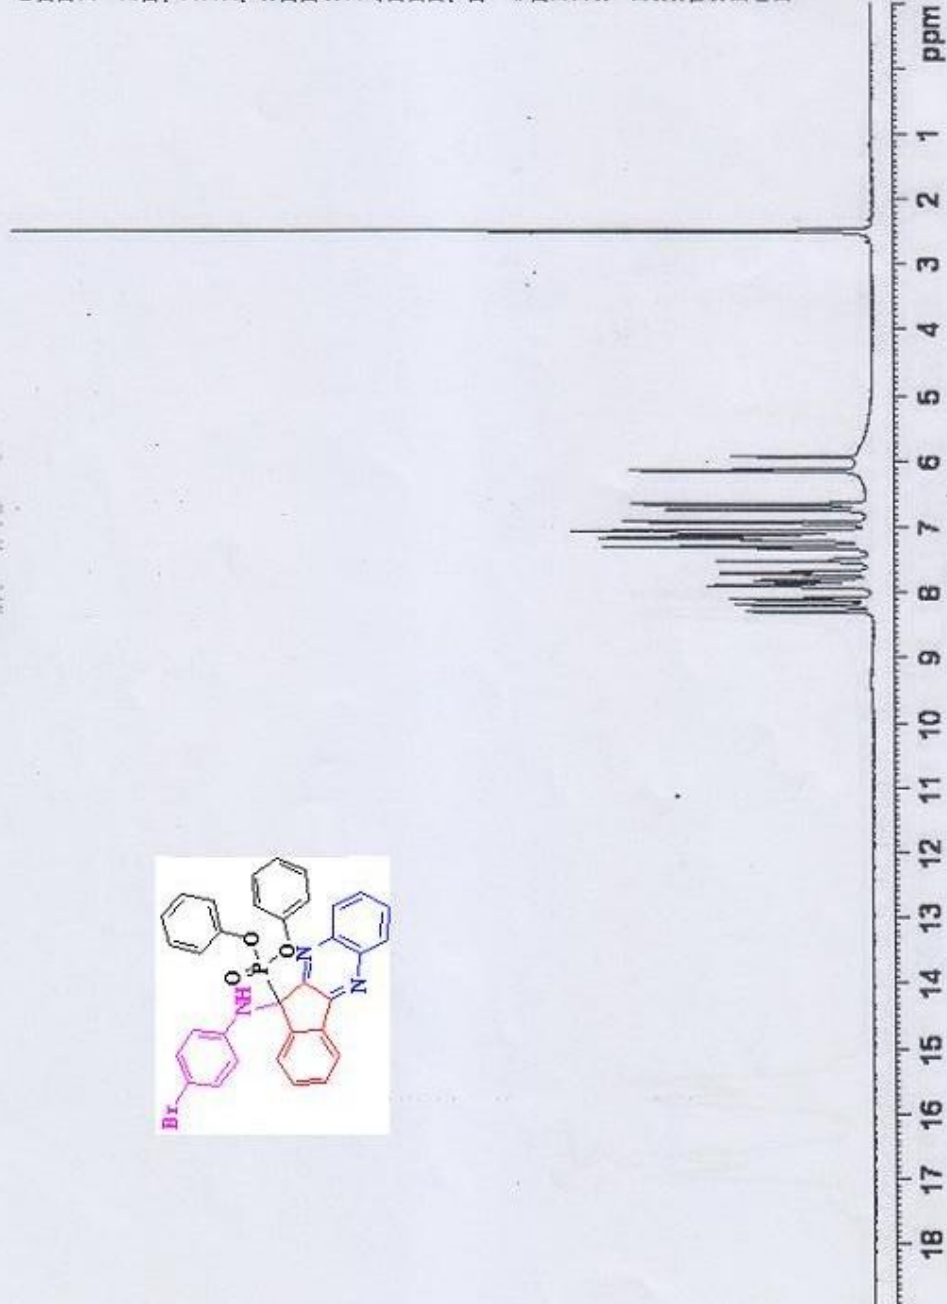

1.00  
1.09  
1.12  
2.32  
1.24  
2.29  
0.83  
0.61  
2.36  
1.92  
1.70  
1.36  
2.99  
1.84  
1.89  
2.09  
2.04  
0.46

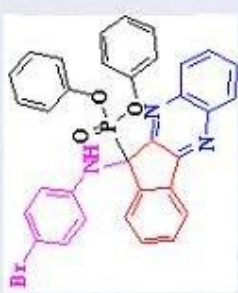

<sup>1</sup>H NMR of 7c



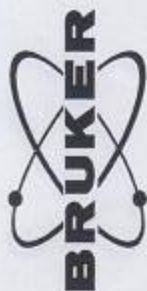

Current Data Parameters  
NAME JH-J  
EXPNO 965  
PROCNO 1

F2 - Acquisition Parameters  
Date\_ 20140921  
Time\_ 14.32  
INSTRUM spect  
PROBHD 5 mm Multinucl  
PULPROG zg  
TD 32768  
SOLVENT DMSO  
NS 16  
DS 0  
SWH 8012.820 Hz  
FIDRES 0.244532 Hz  
AQ 2.0447731 sec  
RG 574.7  
DW 62.400 usec  
DE 6.00 usec  
TE 300.0 K  
D1 5.0000000 sec

==== CHANNEL f1 =====  
NUC1 1H  
P1 9.00 usec  
PL1 -6.00 dB  
SF01 400.1336012 MHz

F2 - Processing parameters  
SI 32768  
SF 400.1300065 MHz  
WDW EM  
SSB 0  
LB 0.30 Hz  
GB 0  
PC 1.00

8.303  
8.286  
8.215  
8.194  
8.117  
8.097  
7.899  
7.877  
7.845  
7.827  
7.807  
7.736  
7.715  
7.692  
7.518  
7.487  
7.335  
7.317  
7.298  
7.211  
7.192  
7.172  
7.083  
7.073  
7.066  
6.836  
6.814  
6.670  
6.651  
6.190  
6.168  
3.421  
2.486  
2.450

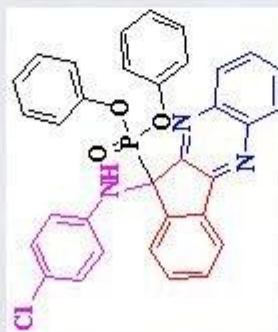

1.00  
1.03  
1.01  
1.13  
2.06  
1.06  
2.10  
3.14  
2.96  
2.00  
2.02  
2.02

8 17 16 15 14 13 12 11 10 9 8 7 6 5 4 3 2 1 ppm

<sup>1</sup>H NMR of 7d

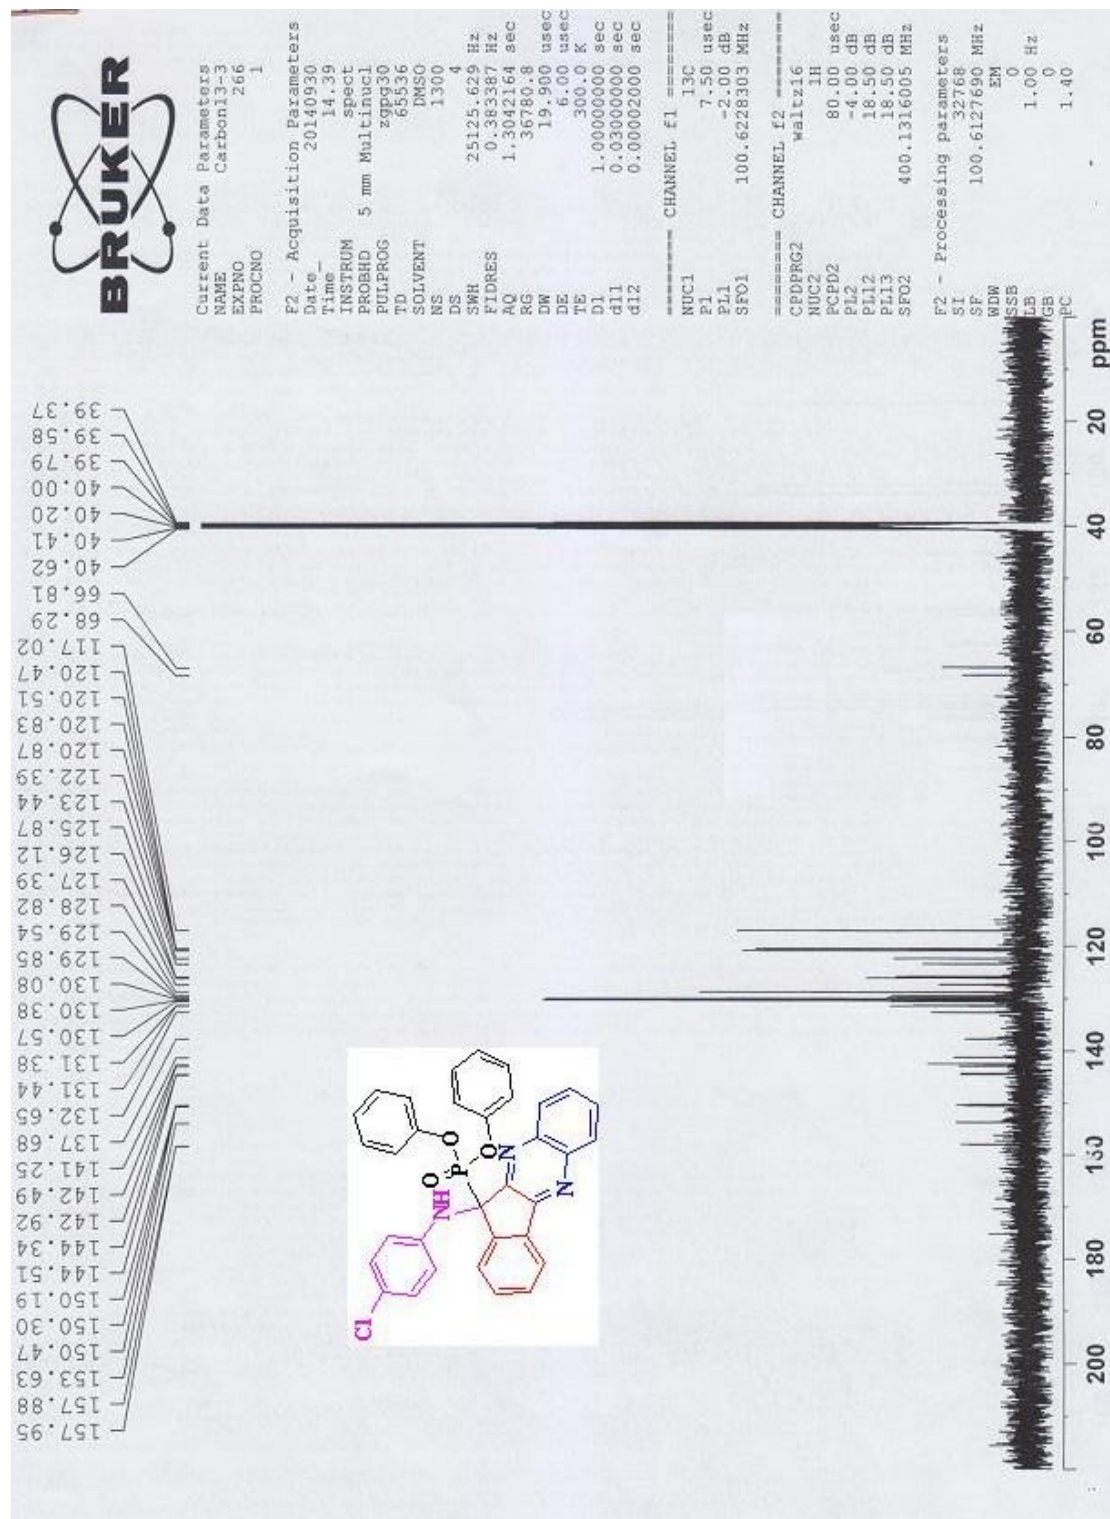

*<sup>13</sup>C NMR of 7d*

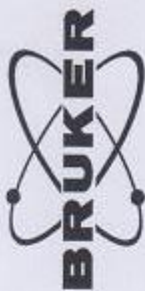

Current Data Parameters  
NAME 3H-3  
EXPNO 988  
PROCNO 1

F2 - Acquisition Parameters  
Date\_ 20140927  
Time 9.35  
INSTRUM spect  
PROBHD 5 mm Multinucl  
PULPROG zg  
TD 32768  
SOLVENT DMSO  
NS 16  
DS 0  
SWH 8012.820 Hz  
FIDRES 0.244532 Hz  
AQ 2.0447731 sec  
RG 728.1  
DW 62.400 usec  
DE 6.00 usec  
TE 300.0 K  
D1 5.00000000 sec

===== CHANNEL f1 =====  
NUC1 1H  
P1 9.00 usec  
PL1 -6.00 dB  
SFO1 400.1336012 MHz

F2 - Processing parameters  
SI 32768  
SF 400.1300065 MHz  
WDW EM  
SSB 0  
LB 0.30 Hz  
GB 0  
PC 1.00

(7e)

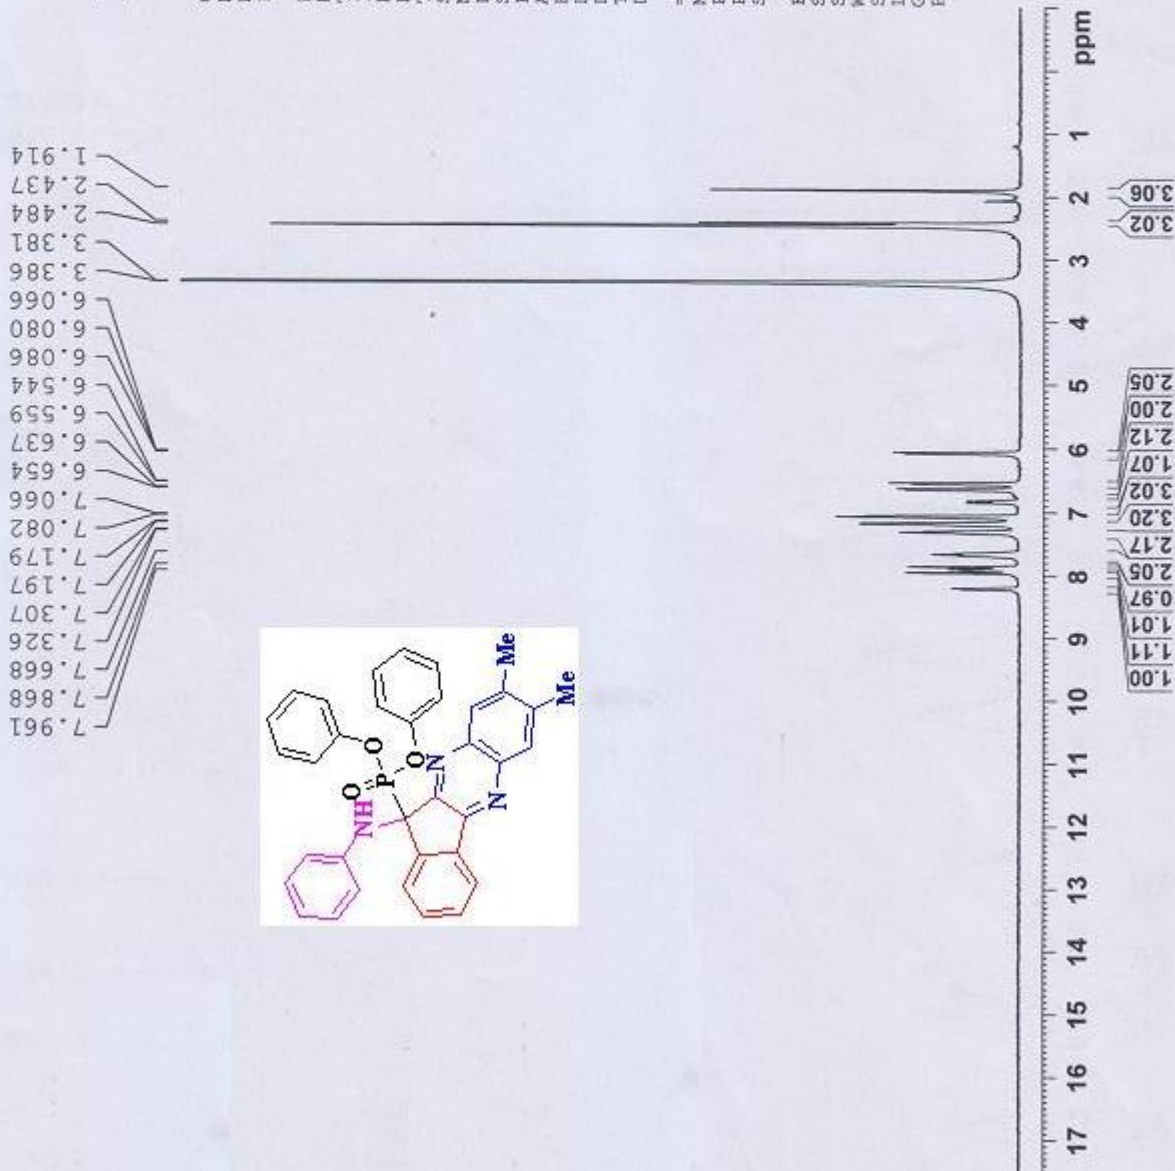

<sup>1</sup>H NMR of 7e

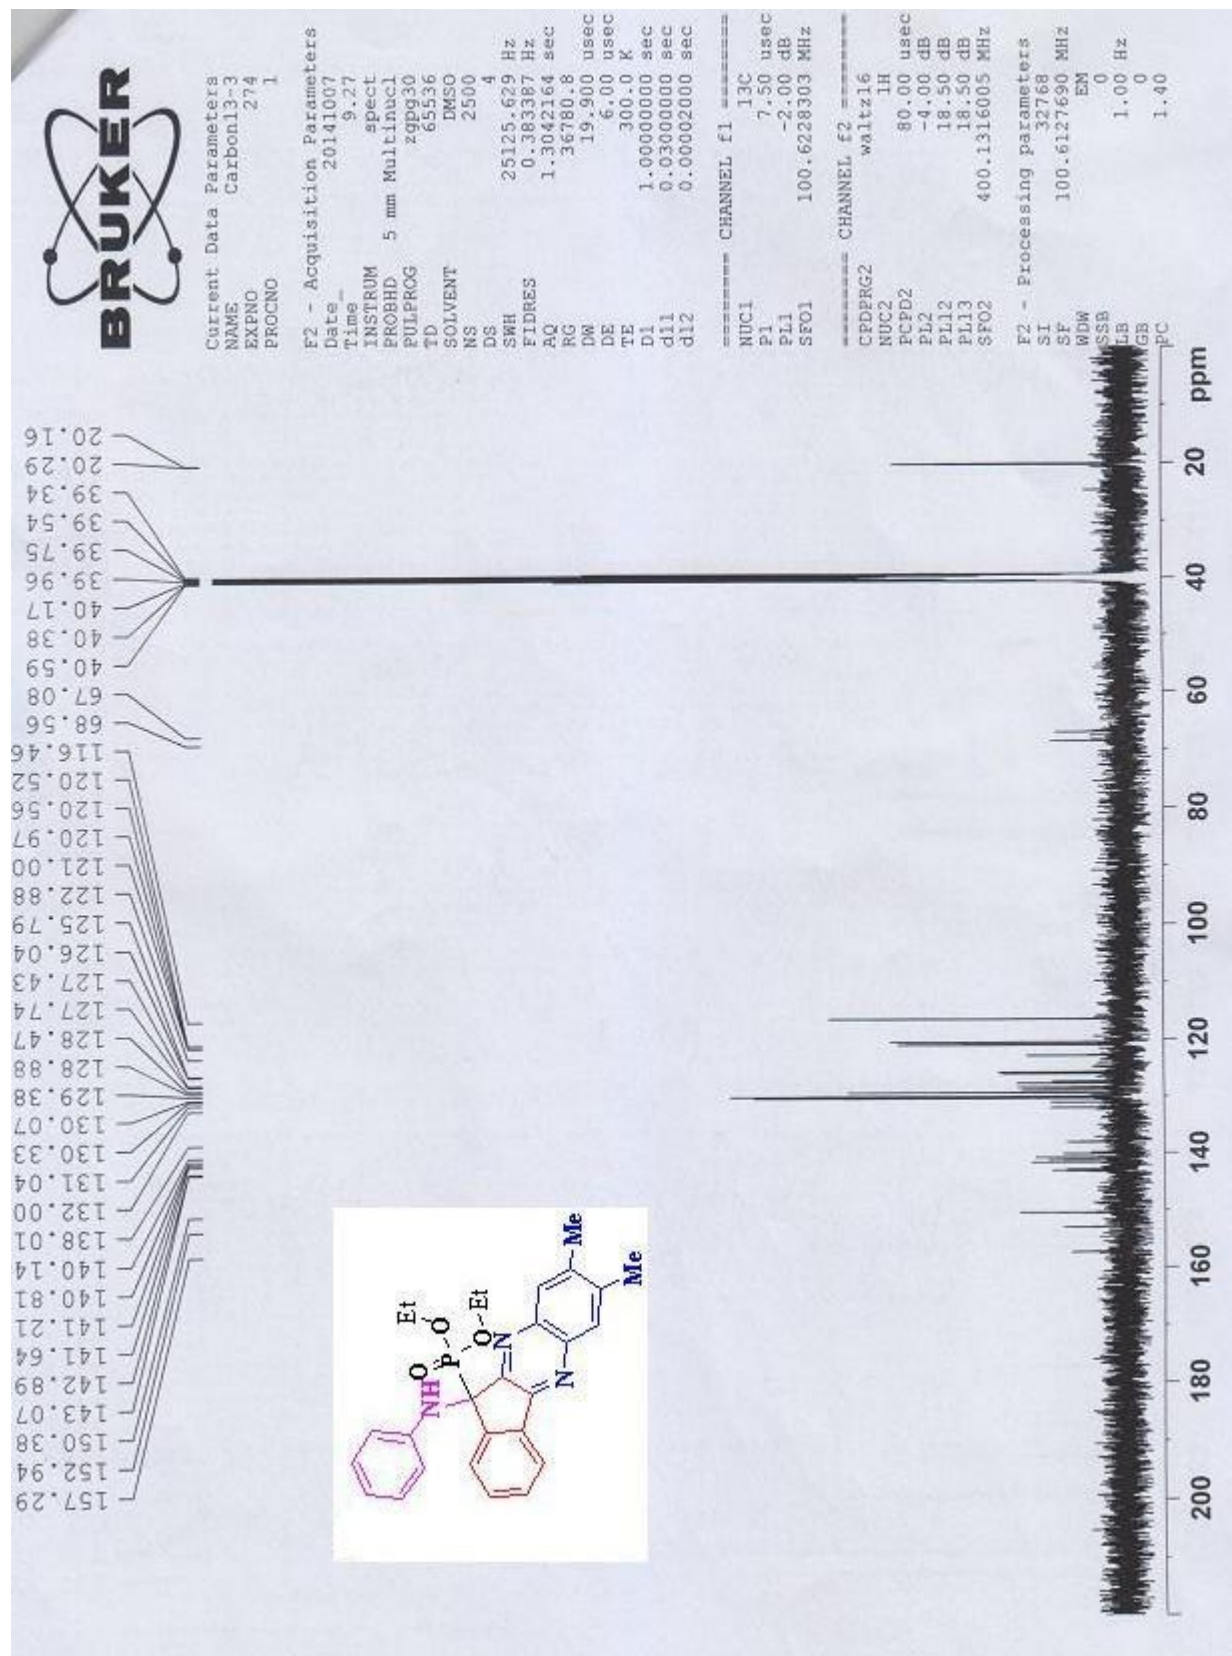

<sup>13</sup>C NMR of 7e

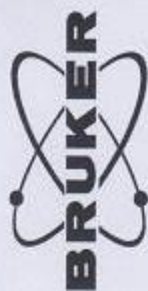

Current Data Parameters  
NAME 3H-3  
EXPNO 966  
PROCNO 1

F2 - Acquisition Parameters  
Date\_ 20140921  
Time\_ 14.38  
INSTRUM spect  
PROBHD 5 mm Multinucl  
PULPROG zg  
TD 32768  
SOLVENT DMSO  
NS 16  
DS 0  
SWH 8012.820 Hz  
FIDRES 0.244532 Hz  
AQ 2.0447731 sec  
RG 1149.4  
DW 62.400 usec  
DE 6.00 usec  
TE 300.0 K  
D1 5.0000000 sec

==== CHANNEL f1 =====  
NUC1 1H  
P1 9.00 usec  
PL1 -6.00 dB  
SFO1 400.1336012 MHz

F2 - Processing parameters  
SI 32768  
SF 400.1300065 MHz  
WDW EM  
SSB 0  
LB 0.30 Hz  
GB 0  
PC 1.00

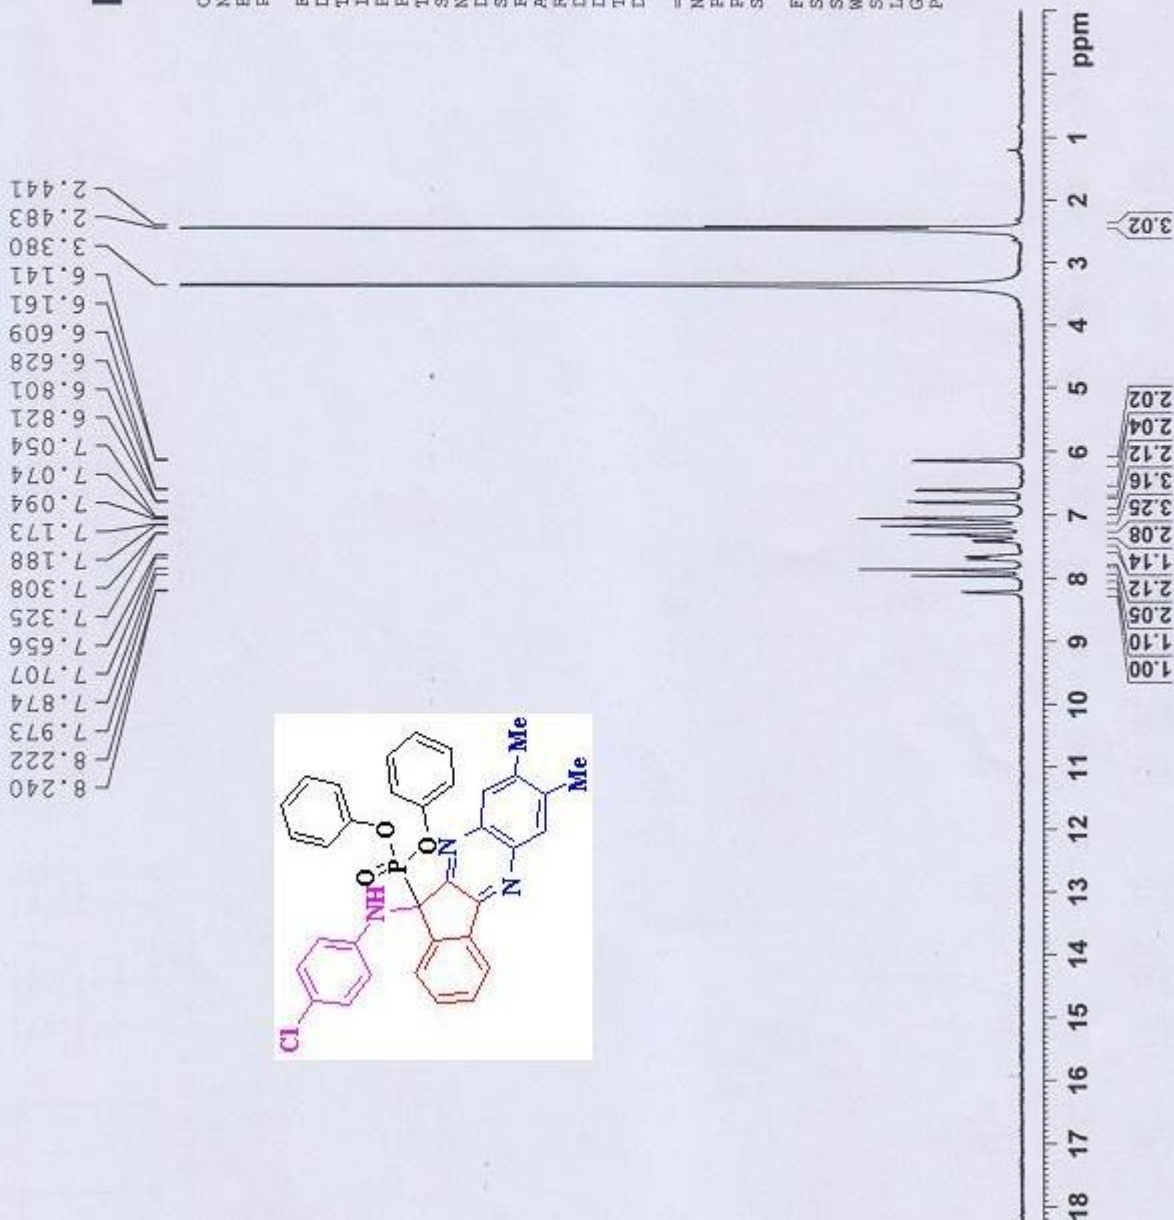

<sup>1</sup>H NMR of 7f

ZR2  
1H NMR

```

Current Data Parameters
NAME      Dr.ghahramanzade
EXPNO     4
PROCNO    1

F2 - Acquisition Parameters
Date_     20151018
Time      11.19
INSTRUM   spect
PROBHD    5 mm BBO BB-1H
PULPROG   zg30
TD         32768
SOLVENT   DMSO
NS         32
DS         1
SWH        7812.500 Hz
FIDRES     0.238419 Hz
AQ         2.0972021 sec
RG         228.1
DW         64.000 usec
DE         6.00 usec
TE         380.0 K
D1         2.00000000 sec

===== CHANNEL f1 =====
NUC1       1H
P1         7.80 usec
PL1        -2.00 dB
SFO1       300.1323986 MHz

F2 - Processing parameters
SI          65536
SF          300.1300000 MHz
WDW         EM
SSB         0
LB          0.30 Hz
GB          0
PC          1.00
  
```

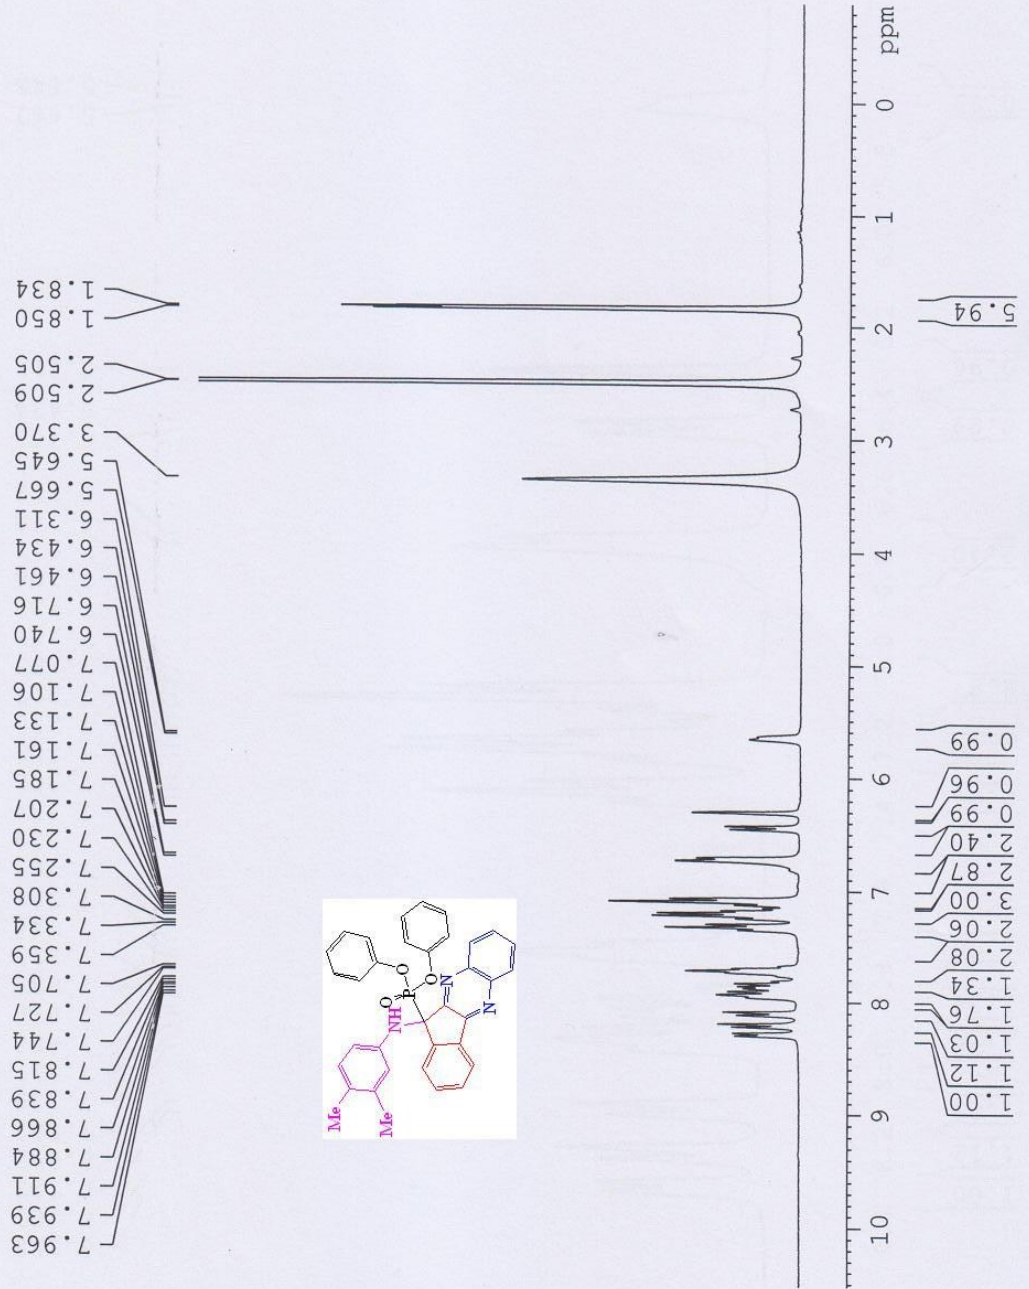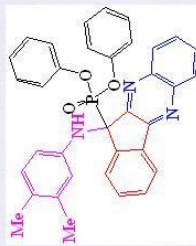

<sup>1</sup>H NMR of 7g

ZR1  
1H NMR

Current Data Parameters  
 NAME Dr.ghahramanzade  
 EXPNO 3  
 PROCNO 1

F2 - Acquisition Parameters

Date\_ 20151018  
 Time 11.15  
 INSTRUM spect  
 PROBHD 5 mm BBO BB-1H  
 PULPROG zg30  
 TD 32768  
 SOLVENT DMSO  
 NS 13  
 DS 1  
 SWH 7812.500 Hz  
 FIDRES 0.238419 Hz  
 AQ 2.0972021 sec  
 RG 228.1  
 DW 64.000 usec  
 DE 6.00 usec  
 TE 380.0 K  
 D1 2.0000000 sec

==== CHANNEL f1 =====  
 NUC1 1H  
 P1 7.80 usec  
 PL1 -2.00 dB  
 SFO1 300.1323986 MHz

F2 - Processing parameters  
 SI 65536  
 SF 300.1300000 MHz  
 WDW EM  
 SSB 0  
 LB 0.30 Hz  
 GB 0  
 PC 1.00

7.941  
7.918  
7.891  
7.885  
7.879  
7.852  
7.829  
7.829  
7.740  
7.728  
7.728  
7.717  
7.366  
7.341  
7.314  
7.257  
7.232  
7.210  
7.188  
7.164  
7.118  
7.093  
6.736  
6.708  
6.688  
6.652  
6.422  
6.392  
6.244  
6.235  
6.214  
6.205  
3.437  
3.378  
2.510  
2.505

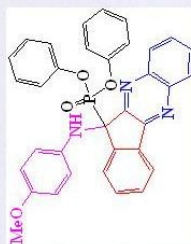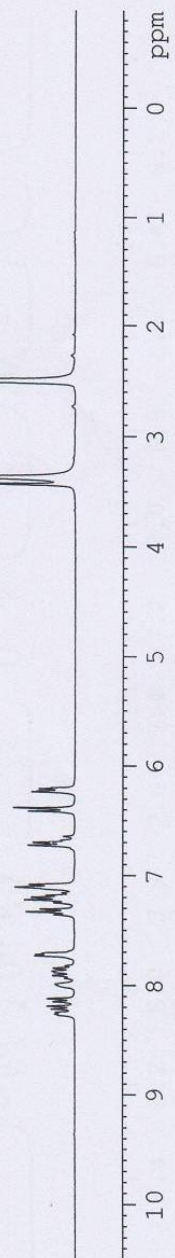

3.08  
1.00  
1.03  
1.03  
0.97  
2.11  
1.98  
2.00  
2.93  
2.86  
2.22  
1.98  
1.99

<sup>1</sup>H NMR of 7h





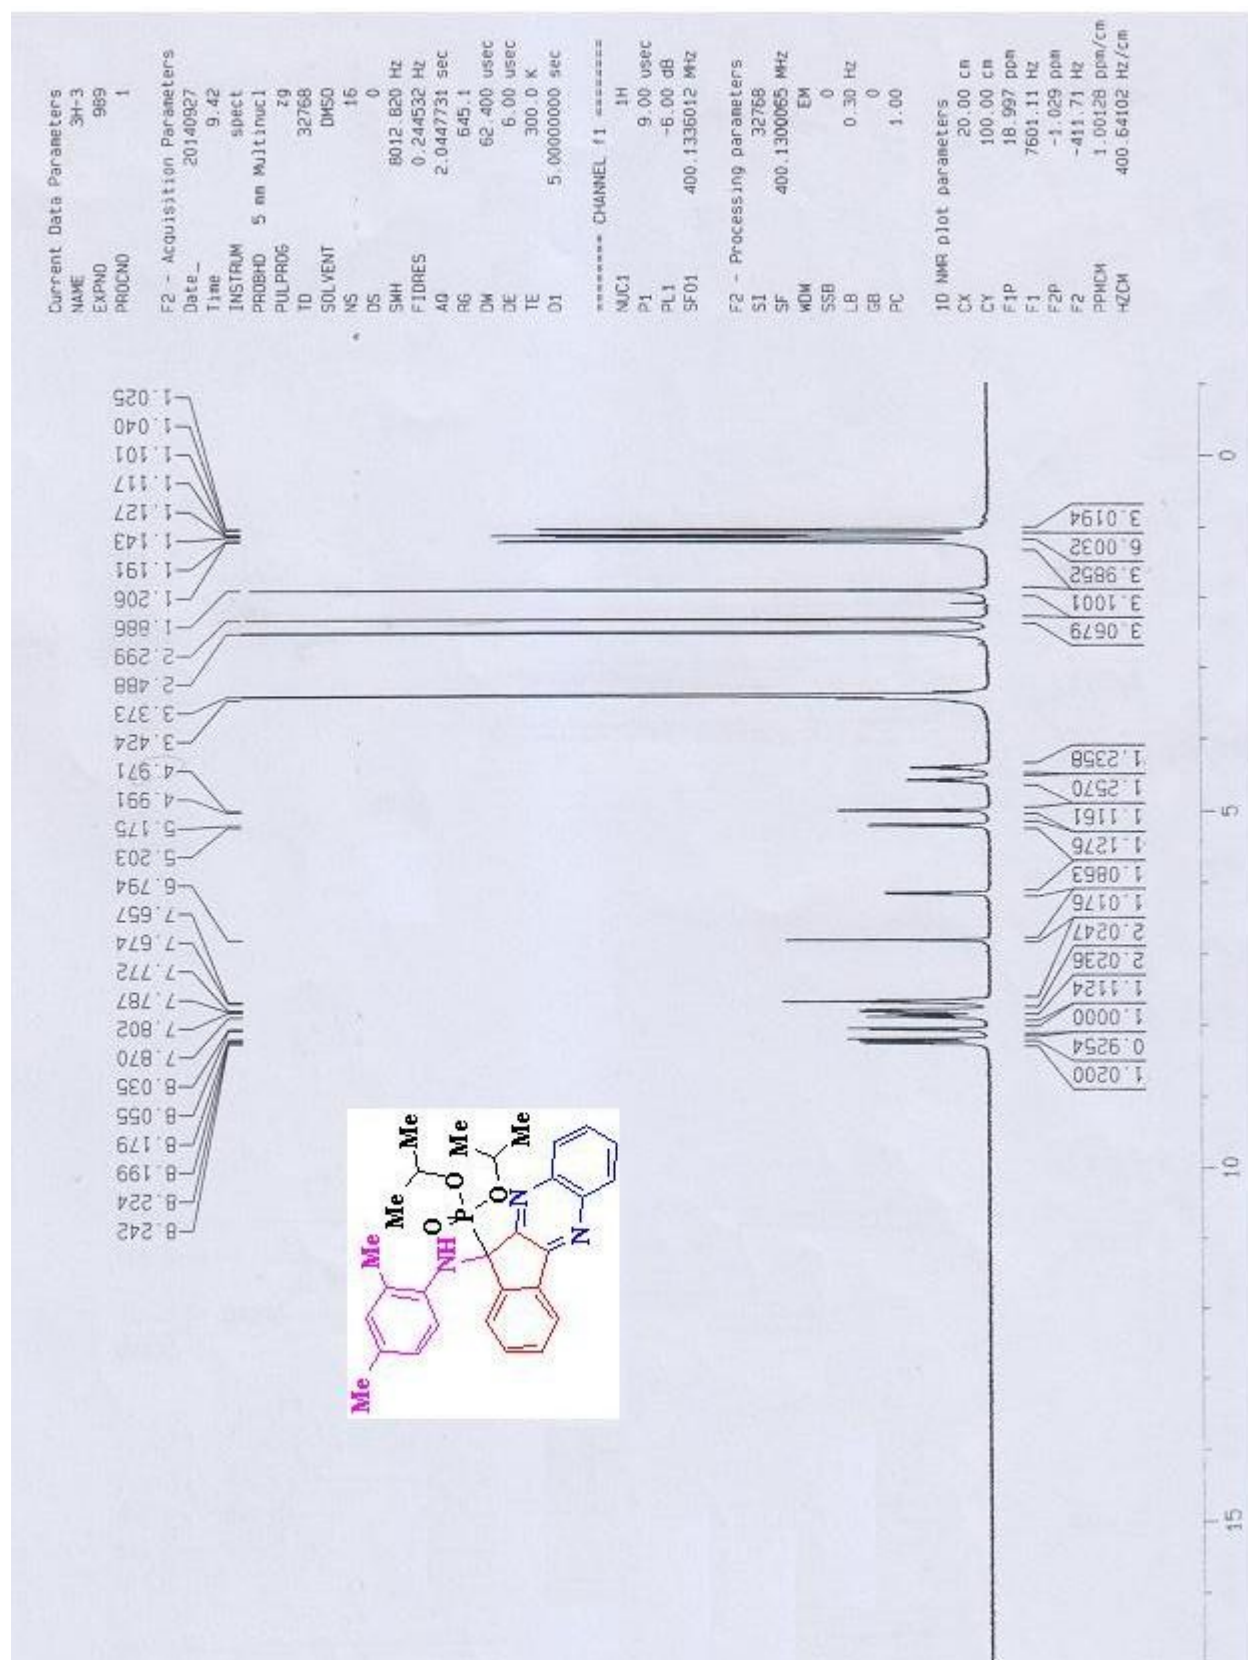

<sup>1</sup>H NMR of 7j

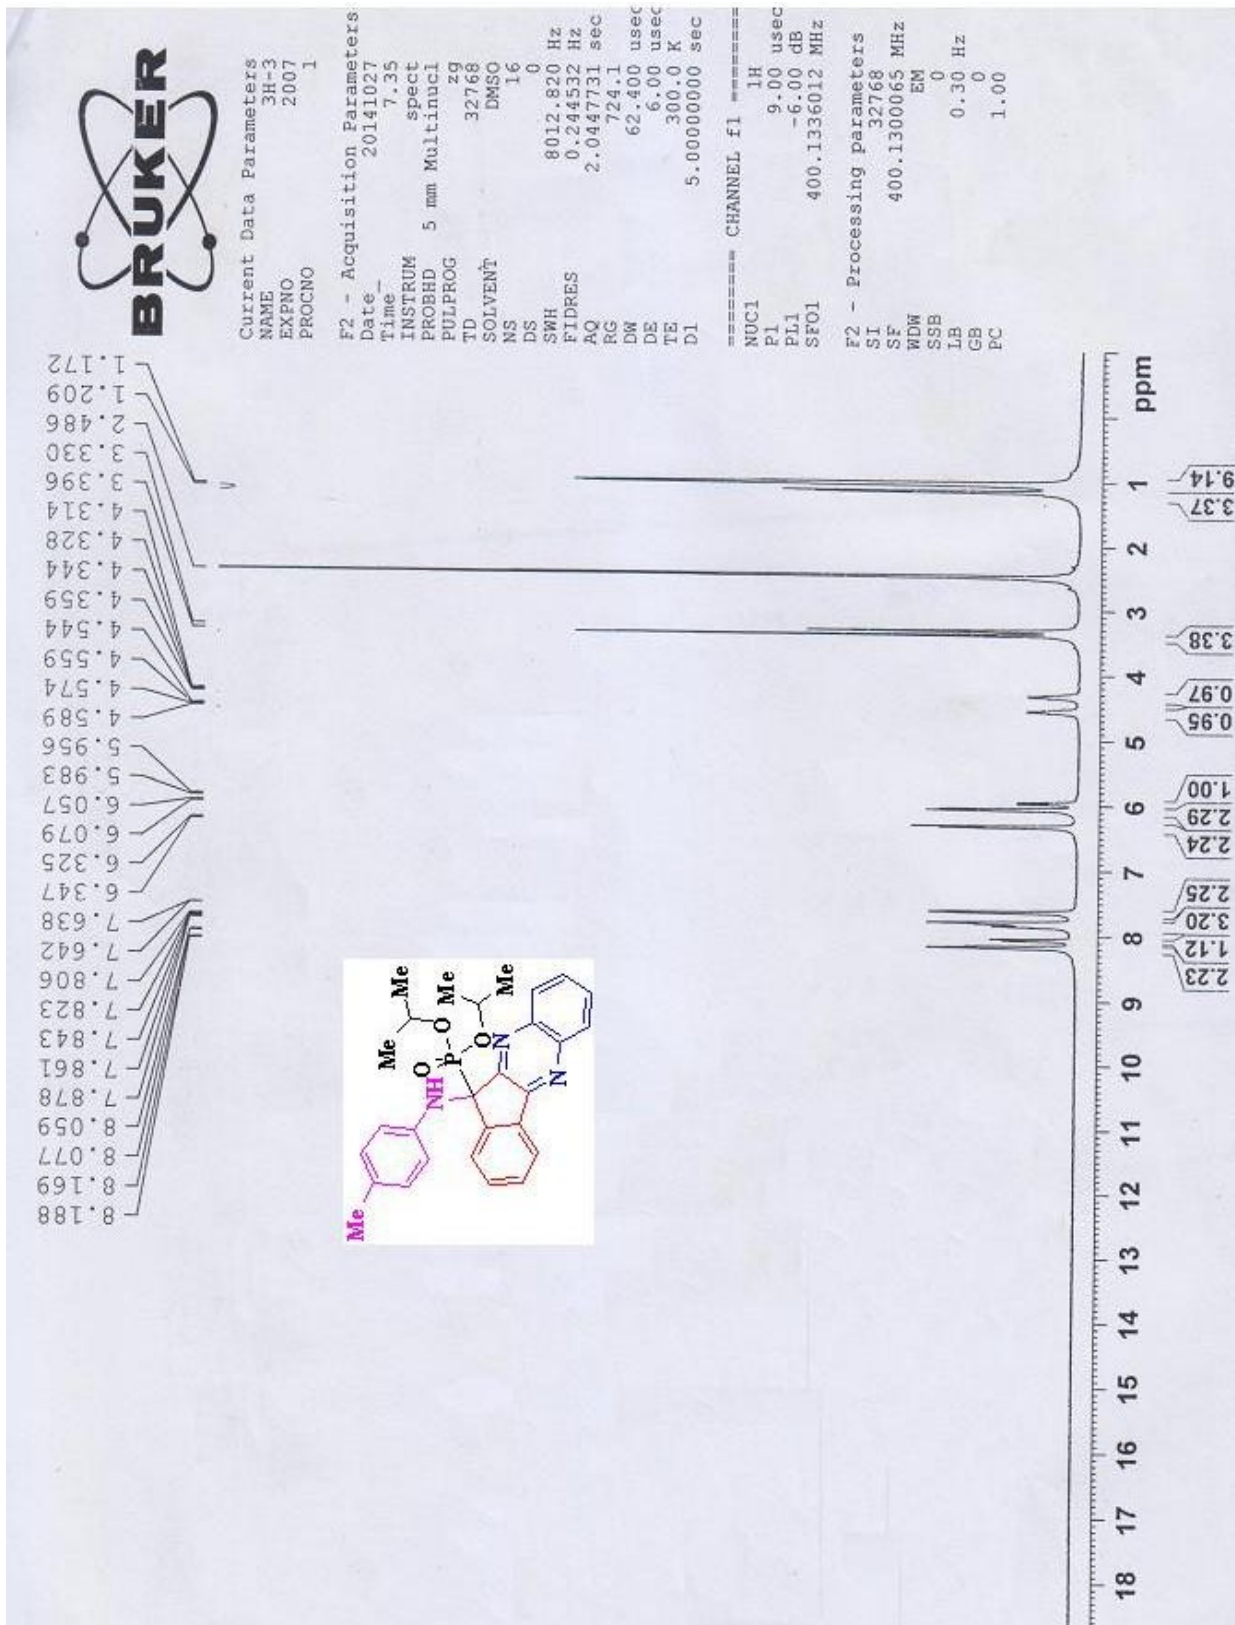

<sup>1</sup>H NMR of 7k

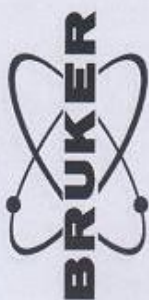

Current Data Parameters  
NAME Carbon13-3  
EXPNO 313  
PROCNO 1

F2 - Acquisition Parameters  
Date\_ 20141117  
Time 15.23  
INSTRUM spect  
PROBHD 5 mm Multinucl  
PULPROG zgpg30  
TD 65536  
SOLVENT DMSO  
NS 2500  
DS 4  
SWH 25125.629 Hz  
FIDRES 0.383387 Hz  
AQ 1.3042164 sec  
RG 14596.5  
DW 19.900 usec  
DE 6.00 usec  
TE 300.0 K  
D1 1.00000000 sec  
d11 0.03000000 sec  
d12 0.00002000 sec

=====  
CHANNEL f1 =====  
NUC1 13C  
P1 7.50 usec  
PL1 -2.00 dB  
SFO1 100.6228303 MHz

=====  
CHANNEL f2 =====  
CPDPRG2 waltz16  
NUC2 1H  
PCPD2 80.00 usec  
PL2 -4.00 dB  
PL12 18.50 dB  
PL13 18.50 dB  
SFO2 400.1316005 MHz

F2 - Processing parameters  
SI 32768  
SF 100.6127690 MHz  
WDW EM  
SSB 0  
LB 1.00 Hz  
GB 0  
PC 1.40

159.67  
153.79  
152.73  
144.74  
144.68  
142.20  
141.17  
139.18  
137.36  
132.12  
130.96  
130.53  
130.22  
129.78  
129.42  
127.08  
122.90  
117.56  
114.35  
68.89  
67.46  
64.72  
64.65  
64.40  
64.33  
55.31  
40.55  
40.34  
40.13  
39.92  
39.72  
39.51  
39.30  
16.49

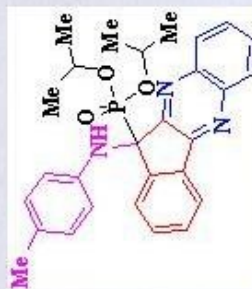

200 180 160 140 120 100 80 60 40 20 ppm

<sup>13</sup>C NMR of 7k



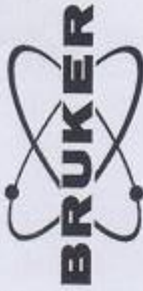

Current Data Parameters  
NAME 3H-3  
EXPNO 999  
PROCNO 1

F2 - Acquisition Parameters

Date\_ 20140928  
Time\_ 8.40  
INSTRUM spect  
PROBHD 5 mm Multinucl  
PULPROG zg  
TD 32768  
SOLVENT DMSO  
NS 16  
DS 0  
SWH 8012.820 Hz  
FIDRES 0.244532 Hz  
AQ 2.0447731 sec  
RG 512  
DW 62.400 usec  
DE 6.00 usec  
TE 300.0 K  
D1 5.00000000 sec

===== CHANNEL f1 =====  
NUC1 1H  
P1 9.00 usec  
PL1 -6.00 dB  
SF01 400.1336012 MHz

F2 - Processing parameters  
SI 32768  
SF 400.1300065 MHz  
WDW EM  
SSB 0  
LB 0.30 Hz  
GB 0  
PC 1.00

1.170  
1.878  
2.410  
2.446  
2.481  
3.406  
3.795  
3.814  
3.833  
3.850  
3.964  
3.982  
3.999  
5.940  
5.948  
5.960  
6.203  
6.231  
6.483  
6.502  
7.565  
7.583  
7.601  
7.614  
7.733  
7.747  
7.821  
7.931  
8.149  
8.165

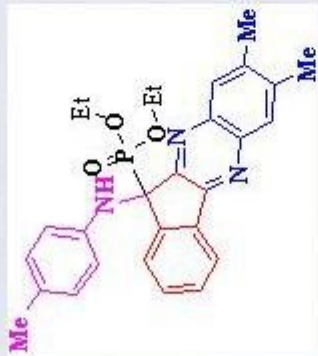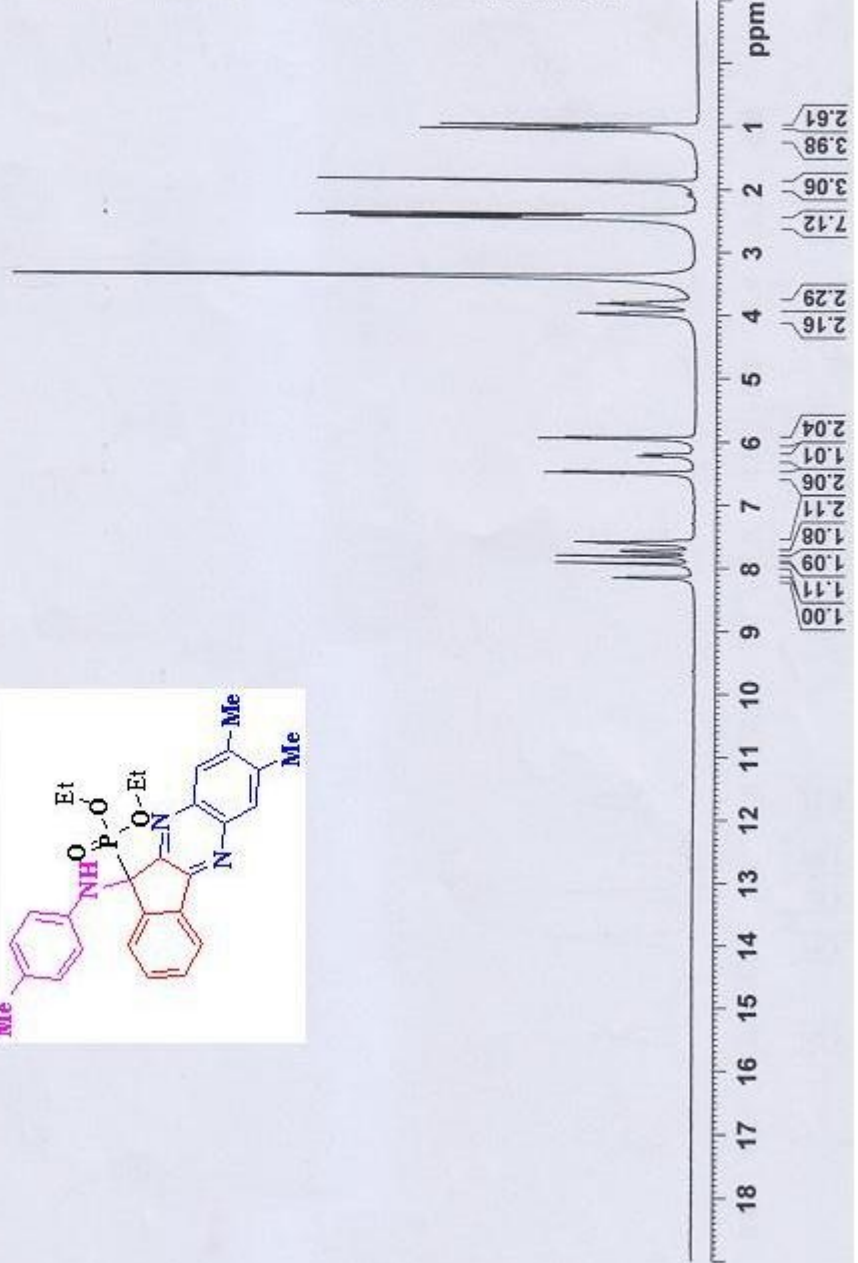

<sup>1</sup>H NMR of 7m

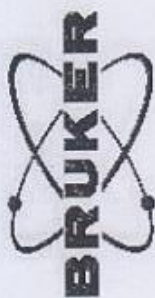

Current Data Parameters  
NAME 3H-3  
EXPNO 2049  
PROCNO 1

F2 - Acquisition Parameters  
Date\_ 20141105  
Time 15:08  
INSTRUM spect  
PROBHD 5 mm Multinucl  
PULPROG zg  
TD 32768  
SOLVENT DMSO  
MS 16  
DS 0  
SWH 8012.820 Hz  
FIDRES 0.244532 Hz  
AQ 2.0447731 sec  
RG 1024  
DW 62.400 usec  
DE 6.00 usec  
TE 300.0 K  
D1 5.00000000 sec

----- CHANNEL f1 -----  
NUC1 1H  
P1 9.00 usec  
PL1 -6.00 dB  
SF01 400.1336012 MHz

F2 - Processing parameters  
SI 32768  
SF 400.1300065 MHz  
WDW EN  
SSB 0  
LB 0.30 Hz  
GB 0  
PC 1.00

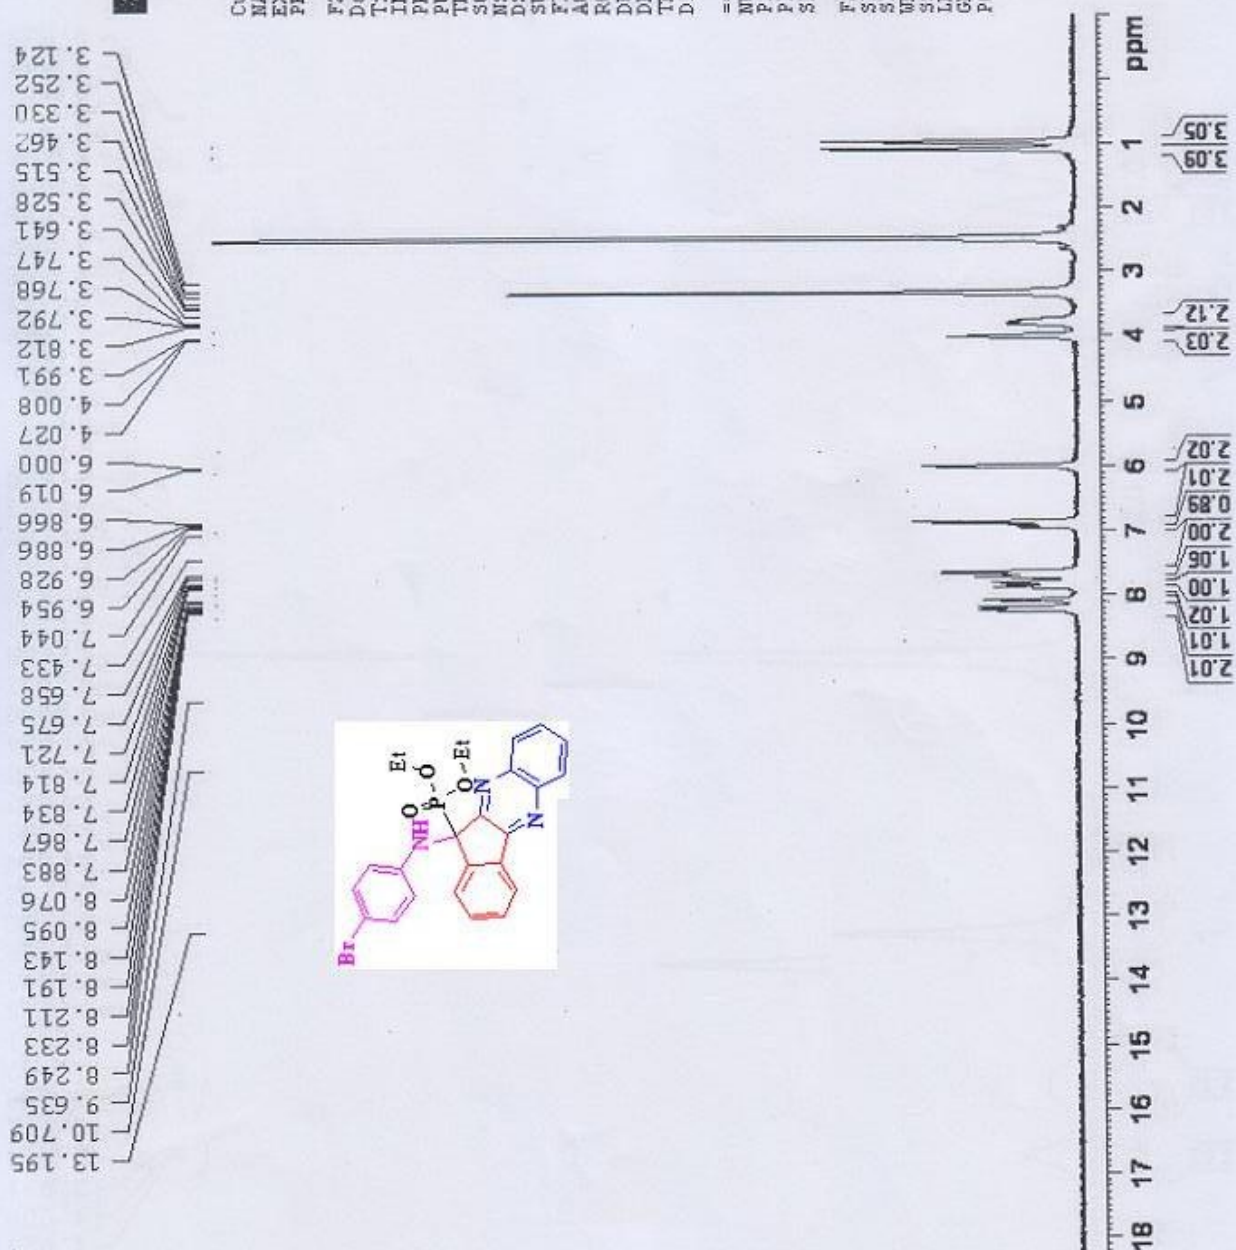

<sup>1</sup>H NMR of 7n

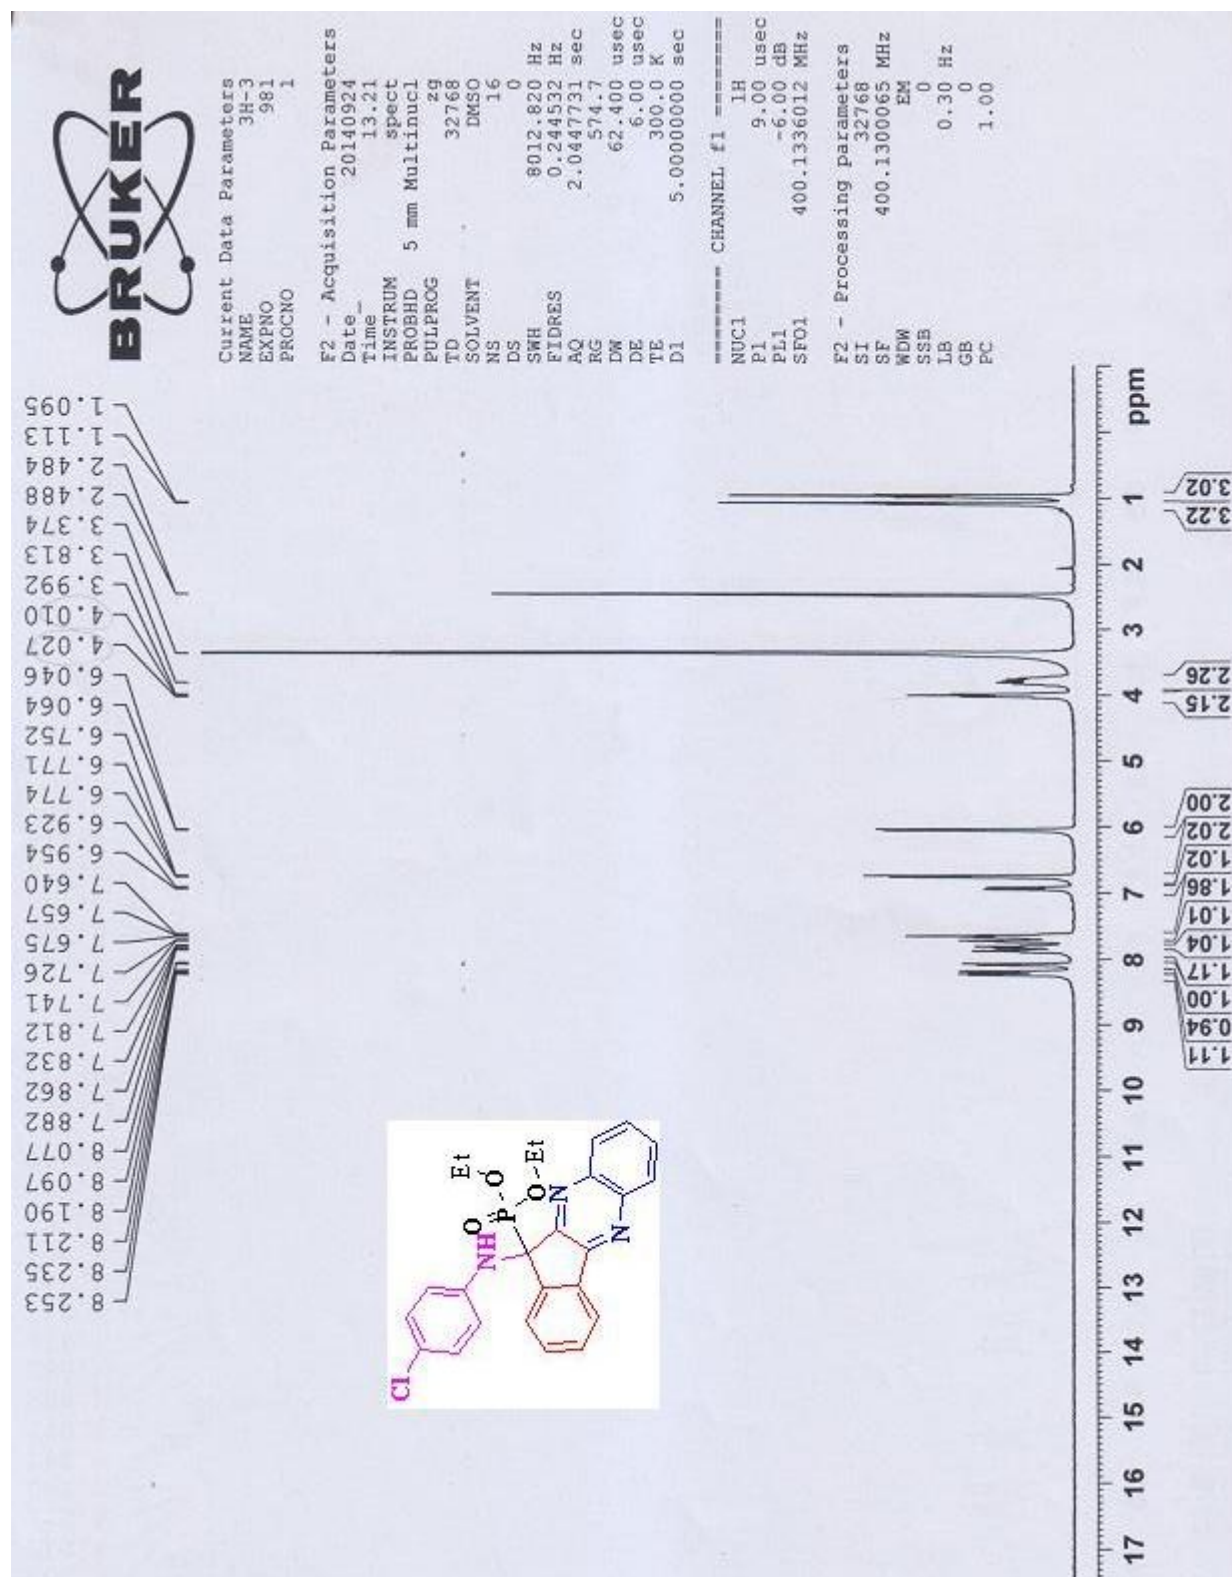

<sup>1</sup>H NMR of 7o

ZR3  
1H NMR

```

Current Data Parameters
NAME      Dr. ghahramanzade
EXPNO     7
PROCNO    1

F2 - Acquisition Parameters
Date_     20151018
Time      11.34
INSTRUM   spect
PROBHD    5 mm BBO BB-1H
PULPROG   zg30
TD         32768
SOLVENT   DMSO
NS         32
DS         1
SWH        7812.500 Hz
FIDRES     0.238419 Hz
AQ         2.0972021 sec
RG         228.1
DE         64.000 usec
TE         380.0 K
D1         2.00000000 sec

===== CHANNEL f1 =====
NUC1       1H
P1         7.80 usec
PL1        -2.00 dB
SFO1       300.1323986 MHz

F2 - Processing parameters
SI         65536
SF         300.1300000 MHz
WDW        EM
SSB        0
LB         0.30 Hz
GB         0
PC         1.00
  
```

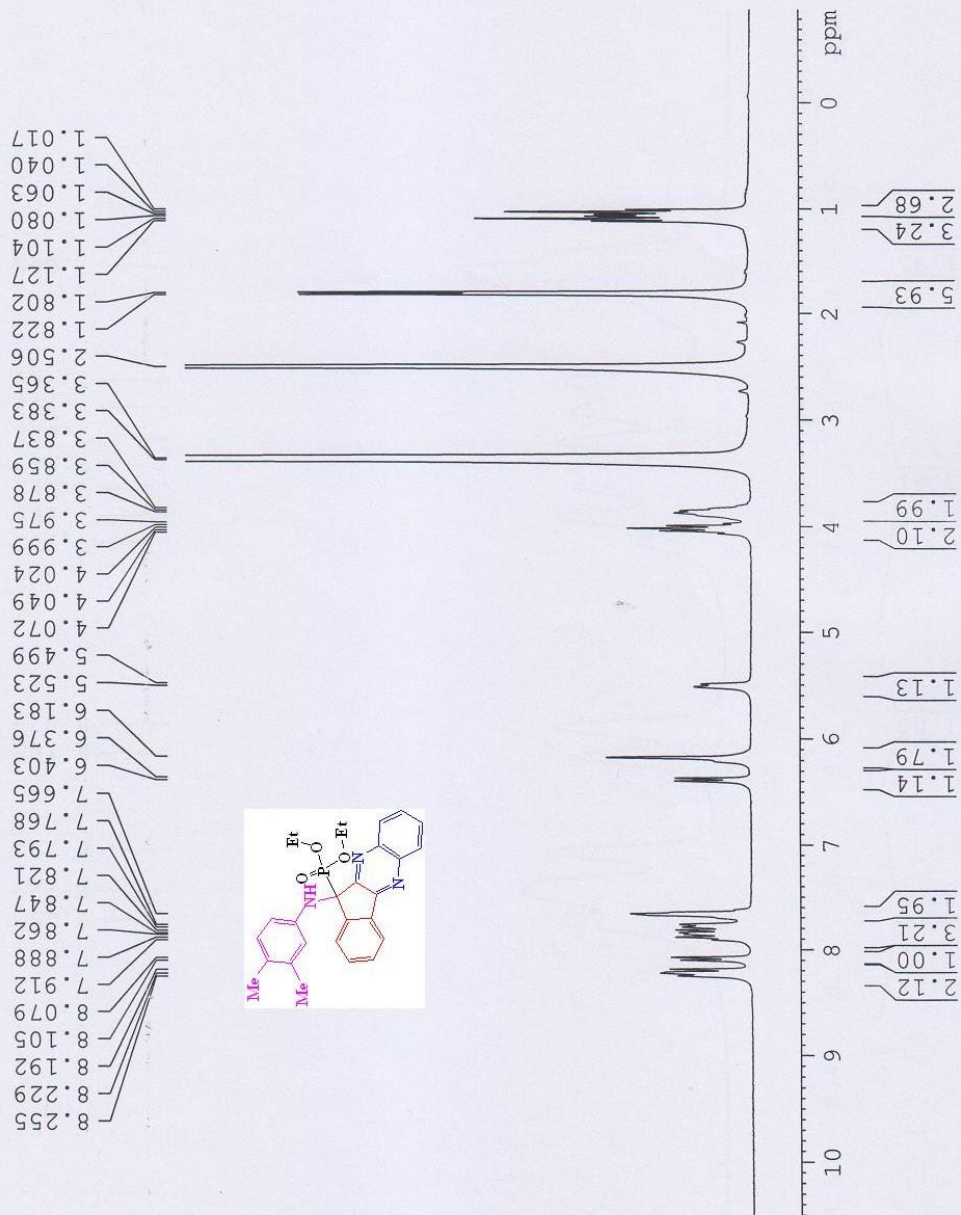

<sup>1</sup>H NMR of 7p



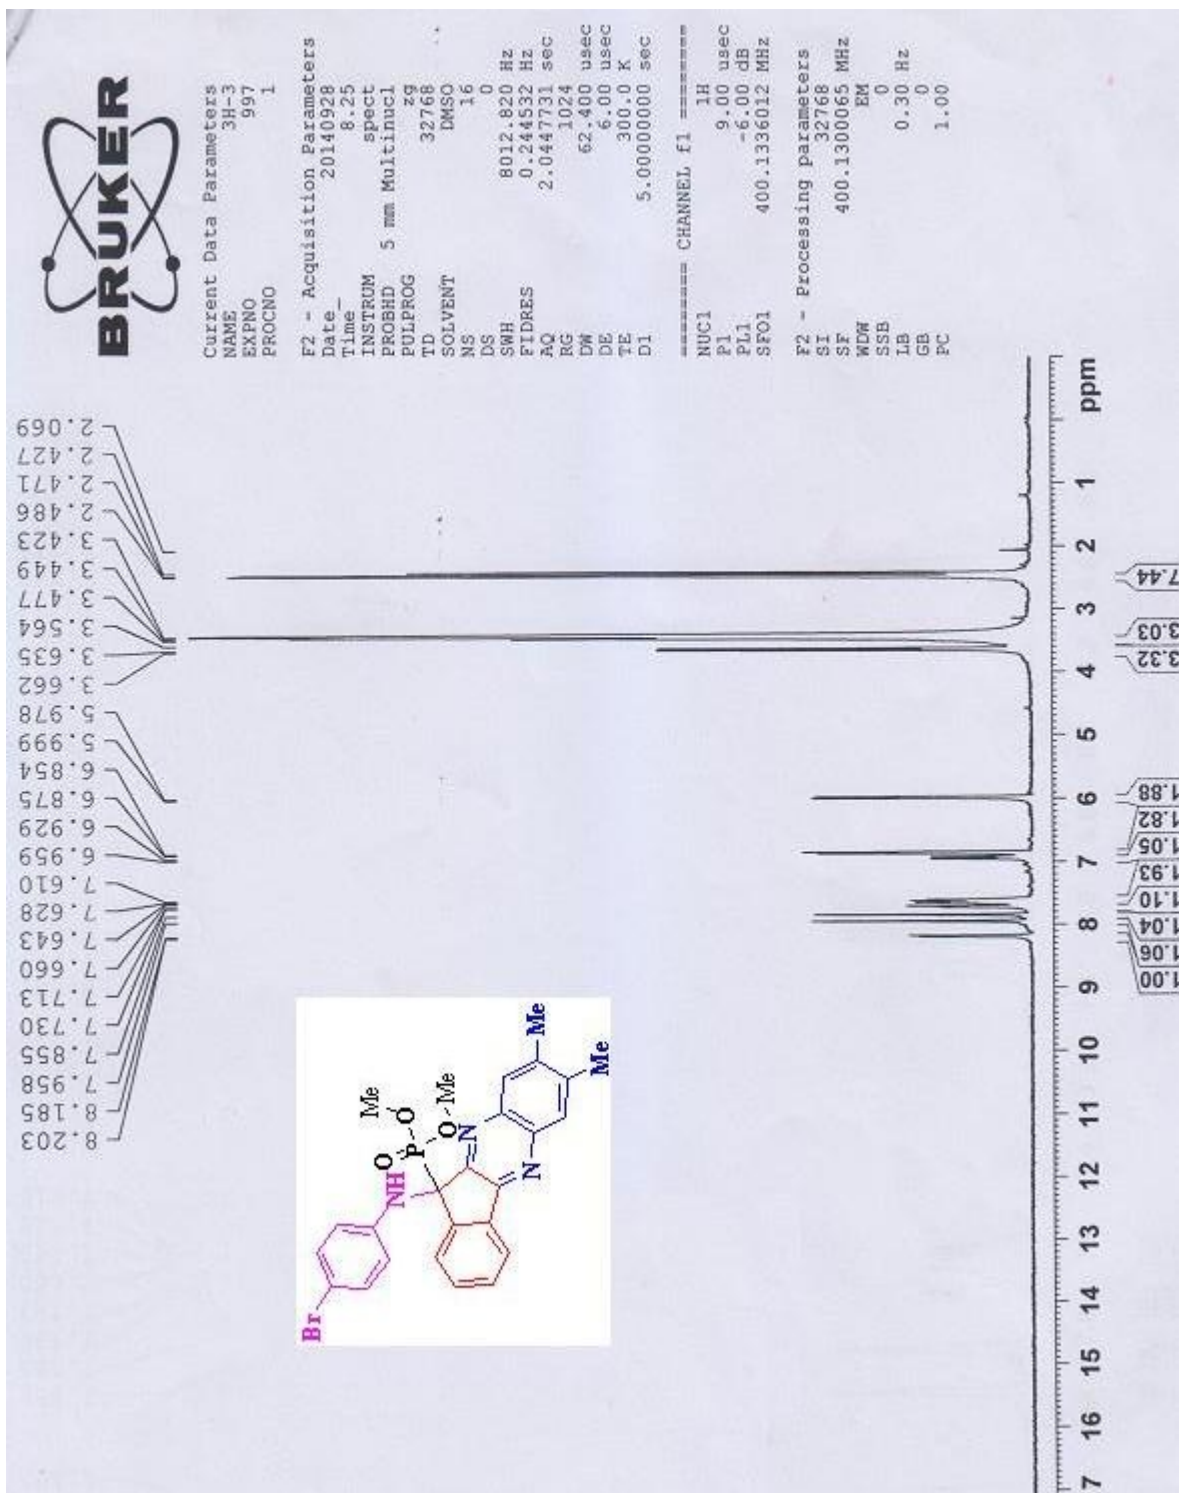

$^1\text{H}$  NMR of 7q

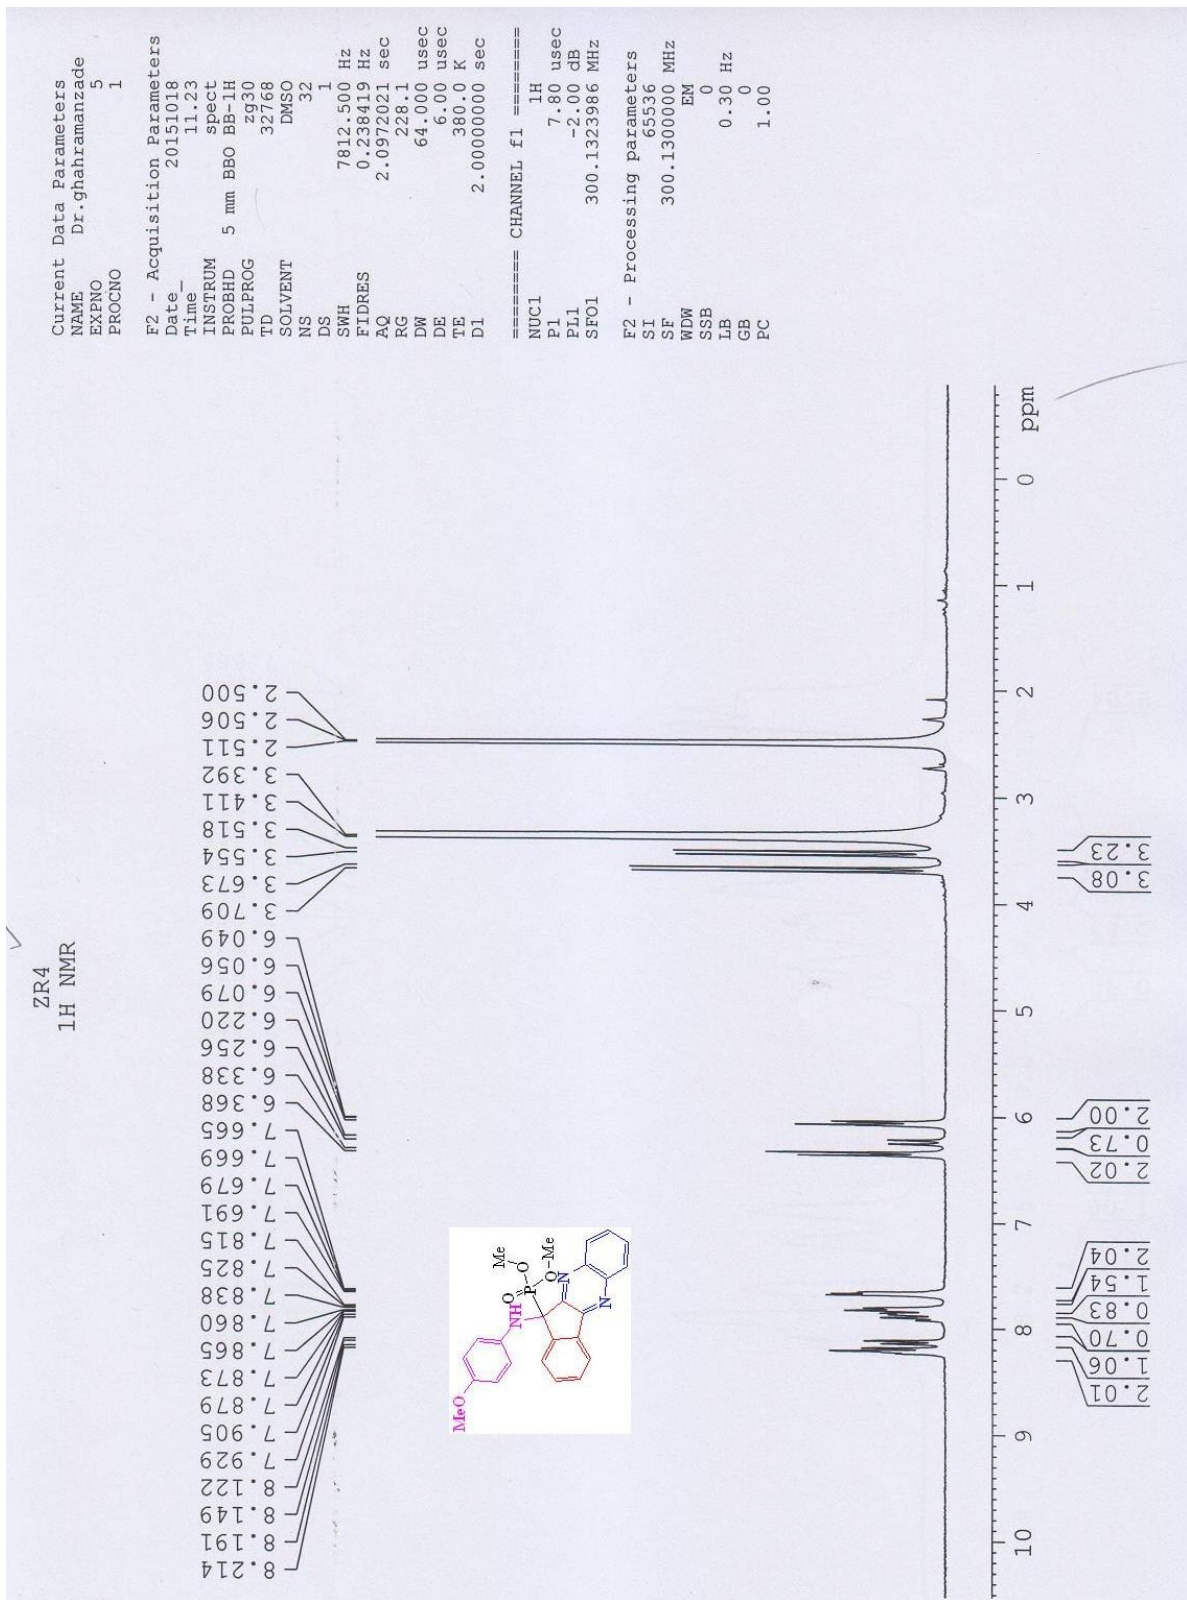

**<sup>1</sup>H NMR of 7r**
